# Supplementary material for: The Spectroscopic and Conductive Properties of Ru(II) Complexes with Potential Anticancer Properties
Source: Hindawi journal article supplement (doi:10.1155/2014/656830), 2014-01-01
Supplement: f1 [file 656830.f1.pdf]

## Supplementary

Table S1: The values of the Ramsey terms that define all the metal-ligand spin spin coupling of the complexes from two different systems treated with DGDZVP(Ru)|6-31+G(d,p) and 3-21G respectively

| DGDZVP(Ru) 6-31+G(d,p) |          |           |          |         |          | 3-21G     |          |           |          |         |          |
|------------------------|----------|-----------|----------|---------|----------|-----------|----------|-----------|----------|---------|----------|
| Complex 1              |          |           |          |         |          | Complex 1 |          |           |          |         |          |
|                        | FC       | SD        | PSO      | DSO     | J (HZ)   |           | FC       | SD        | PSO      | DSO     | J (HZ)   |
| Ru-C9                  | -        | -         | -        | -       | -        | Ru-C9     | -        | -         | -        | -       | -        |
|                        | 7.06E+00 |           | 1.71E+00 | -3.20E- | 8.44E+00 |           | 2.15E+00 |           | 1.74E+00 | -3.21E- | 3.74E+00 |
|                        | 0        | 3.62E-001 | 0        | 002     | 0        |           | 0        | 1.81E-001 | 0        | 002     | 0        |
| Ru-C10                 | -        | -         | -        | -       | -        | Ru-C10    | -        | -         | -        | -       | -        |
|                        | 7.83E+00 | -3.13E-   | 1.67E+00 | -3.37E- | 9.85E+00 |           | 2.32E+00 | -2.63E-   | 1.65E+00 | -3.31E- | 4.26E+00 |
|                        | 0        | 001       | 0        | 002     | 0        |           | 0        | 001       | 0        | 002     | 0        |
| Ru-C13                 | -        | -         | -        | -       | -        | Ru-C13    | -        | -         | -        | -       | -        |
|                        | 7.44E+00 | -2.17E-   | 1.53E+00 | -3.37E- | 9.22E+00 |           | 2.14E+00 | -1.73E-   | 1.60E+00 | -3.32E- | 3.95E+00 |
|                        | 0        | 001       | 0        | 002     | 0        |           | 0        | 001       | 0        | 002     | 0        |
| Ru-C16                 | -        | -         | -        | -       | -        | Ru-C16    | -        | -         | -        | -       | -        |
|                        | 9.25E+00 |           | 1.38E+00 | -3.31E- | 1.04E+00 |           | 2.76E+00 |           | 1.31E+00 | -3.30E- | 4.01E+00 |
|                        | 0        | 2.82E-001 | 0        | 002     | 1        |           | 0        | 9.19E-002 | 0        | 002     | 0        |
| Ru-C18                 | -        | -         | -        | -       | -        | Ru-C18    | -        | -         | -        | -       | -        |
|                        | 8.82E+00 |           | 1.74E+00 | -3.29E- | 1.03E+00 |           | 2.54E+00 |           | 1.69E+00 | -3.26E- | 4.19E+00 |
|                        | 0        | 2.44E-001 | 0        | 002     | 1        |           | 0        | 7.33E-002 | 0        | 002     | 0        |
| Ru-C19                 | -        | -         | -        | -       | -        | Ru-C19    | -        | -         | -        | -       | -        |
|                        | 8.16E+00 | -3.04E-   | 1.04E+00 | -3.34E- | 9.53E+00 |           | 2.55E+00 | -2.52E-   | 1.12E+00 | -3.31E- | 3.96E+00 |
|                        | 0        | 001       | 0        | 002     | 0        |           | 0        | 001       | 0        | 002     | 0        |
| Ru-Cl22                | -        | -         | -        | -       | -        | Ru-Cl22   | -        | -         | -        | -       | -        |
|                        | 1.57E+00 | 2.33E+00  | 2.32E+00 | -9.87E- | 2.71E+00 |           | 1.11E+00 | 2.49E+00  | 2.20E+00 | -9.88E- | 2.56E+00 |
|                        | 0        | 0         | 1        | 003     | 1        |           | 0        | 0         | 1        | 003     | 1        |
| Ru-N12                 | -        | -         | -        | -       | -        | Ru-N12    | -        | -         | -        | -       | -        |
|                        | 1.24E+00 | -1.01E-   | -7.08E-  | -1.46E- | 1.32E+00 |           | 8.92E+00 | -1.07E-   | -6.04E-  | -1.42E- | 9.65E+00 |
|                        | 1        | 001       | 001      | 002     | 1        |           | 0        | 001       | 001      | 002     | 0        |
| Ru-N17                 | -        | -         | -        | -       | -        | Ru-N17    | -        | -         | -        | -       | -        |
|                        | 1.22E+00 | -1.03E-   | -6.93E-  | -1.46E- | 1.30E+00 |           | 8.86E+00 | -1.04E-   | -5.18E-  | -1.42E- | 9.49E+00 |
|                        | 1        | 001       | 001      | 002     | 1        |           | 0        | 001       | 001      | 002     | 0        |
| Complex 2              |          |           |          |         |          | Complex 2 |          |           |          |         |          |
| Ru-C7                  | -        | -         | -        | -       | -        | Ru-C7     | -        | -         | -        | -       | -        |
|                        | 7.31E+00 | -3.58E-   | 1.31E+00 | -3.33E- | 9.01E+00 |           | 2.42E+00 | -3.80E-   | 1.32E+00 | -3.31E- | 4.16E+00 |

|         |           |           |          |         |          |         |           |           |           |         |          |
|---------|-----------|-----------|----------|---------|----------|---------|-----------|-----------|-----------|---------|----------|
|         | 0         | 001       | 0        | 002     | 0        |         | 0         | 001       | 0         | 002     | 0        |
|         | -         |           | -        |         | -        |         | -         |           | -         |         | -        |
| Ru-C8   | 8.36E+00  |           | 1.26E+00 | -3.21E- | 9.21E+00 | Ru-C8   | 2.76E+00  |           | 1.26E+00  | -3.19E- | 3.74E+00 |
|         | 0         | 4.45E-001 | 0        | 002     | 0        |         | 0         | 3.22E-001 | 0         | 002     | 0        |
|         | -         |           | -        |         | -        |         | -         |           | -         |         | -        |
| Ru-C13  | 6.18E+00  |           | 1.71E+00 | -3.08E- | 7.47E+00 | Ru-C13  | 2.13E+00  |           | 1.73E+00  | -3.07E- | 3.55E+00 |
|         | 0         | 4.40E-001 | 0        | 002     | 0        |         | 0         | 3.39E-001 | 0         | 002     | 0        |
|         | -         |           | -        |         | -        |         | -         |           | -         |         | -        |
| Ru-C14  | 7.30E+00  | -4.17E-   | -8.50E-  | -3.30E- | 8.61E+00 | Ru-C14  | 2.11E+00  | -4.33E-   | -9.09E-   | -3.29E- | 3.48E+00 |
|         | 0         | 001       | 001      | 002     | 0        |         | 0         | 001       | 001       | 002     | 0        |
|         | -         |           | -        |         | -        |         | -         |           | -         |         | -        |
| Ru-C18  | 7.30E+00  | -3.58E-   | 1.31E+00 | -3.33E- | 9.01E+00 | Ru-C18  | 2.42E+00  | -3.80E-   | 1.33E+00  | -3.30E- | 4.17E+00 |
|         | 0         | 001       | 0        | 002     | 0        |         | 0         | 001       | 0         | 002     | 0        |
|         | -         |           | -        |         | -        |         | -         |           | -         |         | -        |
| Ru-C19  | 8.34E+00  |           | 1.26E+00 | -3.21E- | 9.18E+00 | Ru-C19  | 2.75E+00  |           | 1.26E+00  | -3.19E- | 3.72E+00 |
|         | 0         | 4.46E-001 | 0        | 002     | 0        |         | 0         | 3.23E-001 | 0         | 002     | 0        |
|         | -         | -         | -        |         | -        |         | -         | -         | -         |         | -        |
| Ru-C110 | 1.17E+00  | 2.36E+00  | 2.40E+00 | -9.72E- | 2.76E+00 | Ru-C110 | -9.17E-   | 2.48E+00  | 2.26E+00  | -9.71E- | 2.60E+00 |
|         | 0         | 0         | 1        | 003     | 1        |         | 001       | 0         | 1         | 003     | 1        |
|         | -         |           | -        |         | -        |         | -         |           | -         |         | -        |
| Ru-N11  | 1.28E+00  | -8.72E-   | -2.53E-  | -1.41E- | 1.29E+00 | Ru-N11  | 8.59E+00  | -1.01E-   |           | -1.37E- | 8.71E+00 |
|         | 1         | 002       | 002      | 002     | 1        |         | 0         | 001       | 1.99E-003 | 002     | 0        |
|         | -         |           | -        |         | -        |         | -         |           | -         |         | -        |
| Ru-N16  | 1.28E+00  | -8.64E-   | -9.98E-  | -1.41E- | 1.29E+00 | Ru-N16  | 8.59E+00  | -1.01E-   |           | -1.37E- | 8.69E+00 |
|         | 1         | 002       | 003      | 002     | 1        |         | 0         | 001       | 1.20E-002 | 002     | 0        |
|         | Complex 3 |           |          |         |          |         | Complex 3 |           |           |         |          |
|         | -         |           | -        |         | -        |         | -         |           | -         |         | -        |
| Ru-C13  | 8.75E+00  | -1.31E-   | 1.30E+00 | -3.59E- | 1.01E+00 | Ru-C13  | 2.83E+00  | -6.54E-   | 1.31E+00  | -3.59E- | 4.25E+00 |
|         | 0         | 002       | 0        | 002     | 1        |         | 0         | 002       | 0         | 002     | 0        |
|         | -         |           | -        |         | -        |         | -         |           | -         |         | -        |
| Ru-C14  | 7.71E+00  | -7.27E-   | 1.84E+00 | -3.59E- | 9.66E+00 | Ru-C14  | 2.42E+00  | -1.44E-   | 1.79E+00  | -3.58E- | 4.39E+00 |
|         | 0         | 002       | 0        | 002     | 0        |         | 0         | 001       | 0         | 002     | 0        |
|         | -         |           | -        |         | -        |         | -         |           | -         |         | -        |
| Ru-C18  | 8.63E+00  | -5.35E-   | 1.29E+00 | -3.58E- | 1.00E+00 | Ru-C18  | 2.79E+00  | -1.41E-   | 1.33E+00  | -3.58E- | 4.29E+00 |
|         | 0         | 002       | 0        | 002     | 1        |         | 0         | 001       | 0         | 002     | 0        |
|         | -         |           | -        |         | -        |         | -         |           | -         |         | -        |
| Ru-C21  | 7.02E+00  | -2.37E-   | 1.63E+00 | -3.47E- | 8.68E+00 | Ru-C21  | 2.02E+00  | -5.09E-   | 1.68E+00  | -3.45E- | 3.79E+00 |
|         | 0         | 003       | 0        | 002     | 0        |         | 0         | 002       | 0         | 002     | 0        |
|         | -         |           | -        |         | -        |         | -         |           | -         |         | -        |
| Ru-C23  | 7.68E+00  | -2.66E-   | 1.86E+00 | -3.57E- | 9.60E+00 | Ru-C23  | 2.40E+00  | -7.16E-   | 1.88E+00  | -3.55E- | 4.38E+00 |
|         | 0         | 002       | 0        | 002     | 0        |         | 0         | 002       | 0         | 002     | 0        |

|        |           |           |           |         |          |        |           |           |           |         |          |
|--------|-----------|-----------|-----------|---------|----------|--------|-----------|-----------|-----------|---------|----------|
|        | -         | -         | -         | -       | -        |        | -         | -         | -         | -       | -        |
|        | 7.09E+00  | -4.84E-   | 1.62E+00  | -3.48E- | 8.80E+00 |        | 2.13E+00  | -1.25E-   | 1.70E+00  | -3.47E- | 3.98E+00 |
| Ru-C25 | 0         | 002       | 0         | 002     | 0        | Ru-C25 | 0         | 001       | 0         | 002     | 0        |
|        | -         | -         | -         | -       | -        |        | -         | -         | -         | -       | -        |
|        | 2.06E+00  | 2.04E+00  | 2.29E+00  | -1.11E- | 2.70E+00 |        | 1.45E+00  | 2.17E+00  | 2.19E+00  | -1.11E- | 2.55E+00 |
| Ru-C17 | 0         | 0         | 1         | 002     | 1        | Ru-C17 | 0         | 0         | 1         | 002     | 1        |
|        | -         | -         | -         | -       | -        |        | -         | -         | -         | -       | -        |
|        | 1.15E+00  | -5.83E-   |           | -1.49E- | 1.13E+00 |        | 8.07E+00  | -6.77E-   |           | -1.45E- | 7.83E+00 |
| Ru-N10 | 1         | 002       | 3.27E-001 | 002     | 1        | Ru-N10 | 0         | 002       | 3.26E-001 | 002     | 0        |
|        | -         | -         | -         | -       | -        |        | -         | -         | -         | -       | -        |
|        | 1.15E+00  | -6.05E-   |           | -1.49E- | 1.13E+00 |        | 8.01E+00  | -7.72E-   |           | -1.46E- | 7.80E+00 |
| Ru-N16 | 1         | 002       | 3.14E-001 | 002     | 1        | Ru-N16 | 0         | 002       | 2.97E-001 | 002     | 0        |
|        | Complex 4 |           |           |         |          |        | Complex 4 |           |           |         |          |
|        | -         | -         | -         | -       | -        |        | -         | -         | -         | -       | -        |
|        | 7.36E+00  | -2.69E-   | 1.17E+00  | -3.17E- | 8.56E+00 |        | 2.45E+00  | -6.12E-   | 1.30E+00  | -3.17E- | 3.84E+00 |
| Ru-C2  | 0         | 003       | 0         | 002     | 0        | Ru-C2  | 0         | 002       | 0         | 002     | 0        |
|        | -         | -         | -         | -       | -        |        | -         | -         | -         | -       | -        |
|        | 6.27E+00  | -1.82E-   | 1.65E+00  | -3.24E- | 8.13E+00 |        | 1.53E+00  | -2.32E-   | 1.69E+00  | -3.24E- | 3.48E+00 |
| Ru-C3  | 0         | 001       | 0         | 002     | 0        | Ru-C3  | 0         | 001       | 0         | 002     | 0        |
|        | -         | -         | -         | -       | -        |        | -         | -         | -         | -       | -        |
|        | 7.37E+00  |           | 1.16E+00  | -3.17E- | 8.56E+00 |        | 2.46E+00  | -5.27E-   | 1.30E+00  | -3.17E- | 3.84E+00 |
| Ru-C4  | 0         | 6.30E-003 | 0         | 002     | 0        | Ru-C4  | 0         | 002       | 0         | 002     | 0        |
|        | -         | -         | -         | -       | -        |        | -         | -         | -         | -       | -        |
|        | 7.96E+00  | -7.38E-   | 2.60E+00  | -3.23E- | 1.07E+00 |        | 2.91E+00  | -1.26E-   | 2.50E+00  | -3.22E- | 5.57E+00 |
| Ru-C5  | 0         | 002       | 0         | 002     | 1        | Ru-C5  | 0         | 001       | 0         | 002     | 0        |
|        | -         | -         | -         | -       | -        |        | -         | -         | -         | -       | -        |
|        | 6.26E+00  | -1.90E-   | 1.64E+00  | -3.24E- | 8.13E+00 |        | 1.53E+00  | -2.40E-   | 1.68E+00  | -3.24E- | 3.48E+00 |
| Ru-C6  | 0         | 001       | 0         | 002     | 0        | Ru-C6  | 0         | 001       | 0         | 002     | 0        |
|        | -         | -         | -         | -       | -        |        | -         | -         | -         | -       | -        |
|        | 7.95E+00  | -6.55E-   | 2.60E+00  | -3.23E- | 1.06E+00 |        | 2.90E+00  | -1.19E-   | 2.51E+00  | -3.22E- | 5.55E+00 |
| Ru-C7  | 0         | 002       | 0         | 002     | 1        | Ru-C7  | 0         | 001       | 0         | 002     | 0        |
|        | -         | -         | -         | -       | -        |        | -         | -         | -         | -       | -        |
|        | 1.28E+00  |           | -7.79E-   | -1.33E- | 1.35E+00 |        | 8.84E+00  |           | -6.00E-   | -1.30E- | 9.43E+00 |
| Ru-N10 | 1         | 3.65E-002 | 001       | 002     | 1        | Ru-N10 | 0         | 2.47E-002 | 001       | 002     | 0        |
|        | -         | -         | -         | -       | -        |        | -         | -         | -         | -       | -        |
|        | 1.28E+00  |           | -7.79E-   | -1.33E- | 1.35E+00 |        | 8.84E+00  |           | -5.99E-   | -1.30E- | 9.43E+00 |
| Ru-N13 | 1         | 3.67E-002 | 001       | 002     | 1        | Ru-N13 | 0         | 2.50E-002 | 001       | 002     | 0        |
|        | -         | -         | -         | -       | -        |        | -         | -         | -         | -       | -        |
|        | 1.07E+00  | -1.64E-   | -6.73E-   | -1.47E- | 1.16E+00 |        | 6.86E+00  | -1.59E-   | -4.56E-   | -1.45E- | 7.49E+00 |
| Ru-N15 | 1         | 001       | 001       | 002     | 1        | Ru-N15 | 0         | 001       | 001       | 002     | 0        |
|        | Complex 5 |           |           |         |          |        | Complex 5 |           |           |         |          |

|        |          |           |          |          |          |        |          |           |          |          |          |
|--------|----------|-----------|----------|----------|----------|--------|----------|-----------|----------|----------|----------|
|        | -        | -         | -        | -        | -        |        | -        | -         | -        | -        | -        |
|        | 7.94E+00 | -8.67E-   | 2.14E+00 | -3.26E-  | 1.01E+00 |        | 2.81E+00 | -6.52E-   | 2.07E+00 | -3.25E-  | 4.98E+00 |
| Ru-C18 | 0        | 003       | 0        | 002      | 1        | Ru-C18 | 0        | 002       | 0        | 002      | 0        |
|        | -        | -         | -        | -        | -        |        | -        | -         | -        | -        | -        |
|        | 6.08E+00 | -1.52E-   | 1.42E+00 | -3.27E-  | 7.69E+00 |        | 1.43E+00 | -1.99E-   | 1.45E+00 | -3.26E-  | 3.11E+00 |
| Ru-C20 | 0        | 001       | 0        | 002      | 0        | Ru-C20 | 0        | 001       | 0        | 002      | 0        |
|        | -        | -         | -        | -        | -        |        | -        | -         | -        | -        | -        |
|        | 7.95E+00 | -1.74E-   | 2.14E+00 | -3.26E-  | 1.01E+00 |        | 2.82E+00 | -7.17E-   | 2.07E+00 | -3.25E-  | 4.99E+00 |
| Ru-C22 | 0        | 002       | 0        | 002      | 1        | Ru-C22 | 0        | 002       | 0        | 002      | 0        |
|        | -        | -         | -        | -        | -        |        | -        | -         | -        | -        | -        |
|        | 6.77E+00 | -8.44E-   | -3.18E-  | 7.57E+00 |          |        | 2.28E+00 | -9.64E-   | -3.17E-  | 3.26E+00 |          |
| Ru-C23 | 0        | 7.09E-002 | 001      | 002      | 0        | Ru-C23 | 0        | 1.27E-002 | 001      | 002      | 0        |
|        | -        | -         | -        | -        | -        |        | -        | -         | -        | -        | -        |
|        | 6.10E+00 | -1.46E-   | 1.43E+00 | -3.27E-  | 7.71E+00 |        | 1.43E+00 | -1.96E-   | 1.45E+00 | -3.26E-  | 3.11E+00 |
| Ru-C26 | 0        | 001       | 0        | 002      | 0        | Ru-C26 | 0        | 001       | 0        | 002      | 0        |
|        | -        | -         | -        | -        | -        |        | -        | -         | -        | -        | -        |
|        | 6.75E+00 | -8.46E-   | -3.18E-  | 7.57E+00 |          |        | 2.27E+00 | -9.66E-   | -3.17E-  | 3.26E+00 |          |
| Ru-C27 | 0        | 6.16E-002 | 001      | 002      | 0        | Ru-C27 | 0        | 6.47E-003 | 001      | 002      | 0        |
|        | -        | -         | -        | -        | -        |        | -        | -         | -        | -        | -        |
|        | 1.27E+00 | -2.15E-   | -1.33E-  | 1.29E+00 |          |        | 8.69E+00 | -9.55E-   | -1.30E-  | 8.80E+00 |          |
| Ru-N14 | 1        | 1.90E-002 | 001      | 002      | 1        | Ru-N14 | 0        | 5.82E-003 | 002      | 002      | 0        |
|        | -        | -         | -        | -        | -        |        | -        | -         | -        | -        | -        |
|        | 1.24E+00 | -1.60E-   | -3.08E-  | -1.50E-  | 1.29E+00 |        | 7.90E+00 | -1.68E-   | -1.85E-  | -1.48E-  | 8.26E+00 |
| Ru-N15 | 1        | 001       | 001      | 002      | 1        | Ru-N15 | 0        | 001       | 001      | 002      | 0        |
|        | -        | -         | -        | -        | -        |        | -        | -         | -        | -        | -        |
|        | 1.27E+00 | -2.34E-   | -1.33E-  | 1.30E+00 |          |        | 8.71E+00 | -1.08E-   | -1.30E-  | 8.82E+00 |          |
| Ru-N21 | 1        | 1.81E-002 | 001      | 002      | 1        | Ru-N21 | 0        | 5.23E-003 | 001      | 002      | 0        |

Table S2: The values of the Ramsey terms that define all the metal-ligand spin spin coupling of the complexes from two different systems treated with ECP(Ru)|6-31+G(d,p) and ECP(Ru,Cl)|6-31G\* respectively

| Ramsey<br>Terms | ECP(6-<br>31+G(d,p) | ECP(6-<br>31G*) | Ramsey<br>Terms |
|-----------------|---------------------|-----------------|-----------------|
| Complex 1       |                     | Complex 1       |                 |

|           | FC (HZ)<br>for Ru | SD for Ru  | PSO for<br>Ru | DSO for<br>Ru | J (HZ) for<br>Ru |           | FC (HZ)<br>for Ru | SD for Ru  | PSO for<br>Ru | DSO for<br>Ru | J (HZ) for<br>Ru |
|-----------|-------------------|------------|---------------|---------------|------------------|-----------|-------------------|------------|---------------|---------------|------------------|
| Ru-C9     | -3.67E-006        | 4.55E-002  | -2.43E-001    | -3.18E-002    | -2.29E-001       | Ru-C9     | -1.79E-006        | 3.65E-002  | -2.55E-001    | -3.00E-002    | -2.48E-001       |
| Ru-C10    | -6.04E-006        | -2.15E-002 | -2.38E-001    | -3.35E-002    | -2.93E-001       | Ru-C10    | 0.00E+000         | -1.41E-002 | -2.43E-001    | -3.06E-002    | -2.88E-001       |
| Ru-C13    | -6.00E-006        | -7.58E-003 | -2.17E-001    | -3.35E-002    | -2.58E-001       | Ru-C13    | -2.90E-006        | 8.14E-004  | -2.34E-001    | -3.09E-002    | -2.64E-001       |
| Ru-C16    | -3.66E-006        | 4.04E-002  | -2.09E-001    | -3.29E-002    | -2.01E-001       | Ru-C16    | 0.00E+000         | 3.01E-002  | -2.00E-001    | -2.98E-002    | -2.00E-001       |
| Ru-C18    | -3.00E-006        | 3.33E-002  | -2.52E-001    | -3.27E-002    | -2.52E-001       | Ru-C18    | 1.33E-006         | 2.31E-002  | -2.51E-001    | -2.99E-002    | -2.58E-001       |
| Ru-C19    | -6.44E-006        | -1.89E-002 | -1.57E-001    | -3.32E-002    | -2.09E-001       | Ru-C19    | 0.00E+000         | -9.33E-003 | -1.69E-001    | -2.98E-002    | -2.08E-001       |
| Ru-Cl22   | 0.00E+000         | -1.71E-001 | 3.17E+000     | -9.93E-003    | 3.35E+000        | Ru-Cl22   | 0.00E+000         | -1.17E-002 | -2.17E-001    | -9.88E-003    | -2.38E-001       |
| Ru-N12    | -3.55E-006        | -3.63E-003 | -9.07E-002    | -1.46E-002    | -1.09E-001       | Ru-N12    | 1.35E-006         | -4.11E-003 | -1.09E-001    | -1.37E-002    | -1.27E-001       |
| Ru-N17    | -3.49E-006        | -3.73E-003 | -8.93E-002    | -1.46E-002    | -1.08E-001       | Ru-N17    | 1.18E-006         | -3.82E-003 | -9.36E-002    | -1.37E-002    | -1.11E-001       |
| Complex 2 |                   |            |               |               |                  | Complex 2 |                   |            |               |               |                  |
| Ru-C7     | -8.10E-006        | -2.42E-002 | -1.86E-001    | -3.31E-002    | -2.43E-001       | Ru-C7     | -5.02E-006        | -2.49E-002 | -1.95E-001    | -3.06E-002    | -2.51E-001       |
| Ru-C8     | -7.05E-006        | 5.42E-002  | -1.89E-001    | -3.18E-002    | -1.67E-001       | Ru-C8     | 0.00E+000         | 5.35E-002  | -1.94E-001    | -2.89E-002    | -1.69E-001       |
| Ru-C13    | -6.10E-006        | 5.10E-002  | -2.39E-001    | -3.06E-002    | -2.19E-001       | Ru-C13    | -5.93E-006        | 5.09E-002  | -2.56E-001    | -2.86E-002    | -2.34E-001       |
| Ru-C14    | -4.52E-006        | -2.90E-002 | -1.27E-001    | -3.28E-002    | -1.89E-001       | Ru-C14    | -1.35E-006        | -2.96E-002 | -1.36E-001    | -2.95E-002    | -1.96E-001       |
| Ru-C18    | -8.10E-006        | -2.42E-002 | -1.87E-001    | -3.31E-002    | -2.44E-001       | Ru-C18    | -5.03E-006        | -2.49E-002 | -1.96E-001    | -3.06E-002    | -2.51E-001       |
| Ru-C19    | -7.04E-006        | 5.42E-002  | -1.88E-001    | -3.18E-002    | -1.66E-001       | Ru-C19    | 0.00E+000         | 5.36E-002  | -1.93E-001    | -2.89E-002    | -1.69E-001       |
| Ru-Cl10   | 0.00E+000         | -1.69E-001 | 3.28E+000     | -9.78E-003    | 3.46E+000        | Ru-Cl10   | 0.00E+000         | -1.10E-002 | -2.25E-001    | -9.74E-003    | -2.46E-001       |
| Ru-N11    | -3.33E-006        | -3.49E-003 | 8.27E-003     | -1.41E-002    | -9.33E-001       | Ru-N11    | 0.00E+000         | -3.67E-003 | 4.69E-004     | -1.30E-002    | -1.62E-001       |

|        |            |            |            |            |            |        |            |            |            |            |            |
|--------|------------|------------|------------|------------|------------|--------|------------|------------|------------|------------|------------|
|        | 006        | 003        |            | 002        | 003        |        | 0          | 003        |            | 002        | 002        |
| Ru-N16 | -3.28E-006 | -3.57E-003 | 1.05E-002  | -1.41E-002 | -7.21E-003 | Ru-N16 | 0.00E+000  | -3.73E-003 | 2.52E-003  | -1.30E-002 | -1.42E-002 |
|        | Complex 3  |            |            |            |            |        | Complex 3  |            |            |            |            |
| Ru-C13 | -6.29E-006 | 8.47E-003  | -1.86E-001 | -3.57E-002 | -2.13E-001 | Ru-C13 | 0.00E+000  | -1.87E-001 | -3.27E-002 | -2.10E-001 |            |
| Ru-C14 | -7.82E-006 | 2.83E-003  | -2.47E-001 | -3.56E-002 | -2.79E-001 | Ru-C14 | -1.39E-006 | -2.42E-001 | -3.31E-002 | -2.74E-001 |            |
| Ru-C18 | -6.23E-006 | 4.71E-003  | -1.84E-001 | -3.56E-002 | -2.15E-001 | Ru-C18 | 1.32E-006  | 1.50E-003  | -1.89E-001 | -3.26E-002 | -2.20E-001 |
| Ru-C21 | -7.37E-006 | 1.06E-002  | -2.25E-001 | -3.45E-002 | -2.49E-001 | Ru-C21 | -2.65E-006 | -2.40E-001 | -3.24E-002 | -2.61E-001 |            |
| Ru-C23 | -7.69E-006 | 7.47E-003  | -2.49E-001 | -3.55E-002 | -2.77E-001 | Ru-C23 | -1.47E-006 | -2.54E-001 | -3.29E-002 | -2.78E-001 |            |
| Ru-C25 | -7.51E-006 | 6.02E-003  | -2.24E-001 | -3.46E-002 | -2.53E-001 | Ru-C25 | -2.80E-006 | -2.41E-001 | -3.25E-002 | -2.71E-001 |            |
| Ru-Cl7 | 0.00E+000  | -1.24E-001 | 3.06E+000  | -1.11E-002 | 3.20E+000  | Ru-Cl7 | 0.00E+000  | -7.99E-003 | -2.11E-001 | -1.11E-002 | -2.30E-001 |
| Ru-N10 | -3.25E-006 | -2.18E-003 | 6.56E-002  | -1.49E-002 | 4.85E-002  | Ru-N10 | -1.10E-006 | -1.94E-003 | -1.39E-002 | 4.50E-002  |            |
| Ru-N16 | -3.25E-006 | -2.24E-003 | 6.39E-002  | -1.49E-002 | 4.67E-002  | Ru-N16 | -1.02E-006 | -2.53E-003 | -1.39E-002 | 4.11E-002  |            |
|        | Complex 4  |            |            |            |            |        | Complex 4  |            |            |            |            |
| Ru-C2  | -3.54E-006 | 8.88E-003  | -1.74E-001 | -3.14E-002 | -1.97E-001 | Ru-C2  | 5.22E-006  | 8.93E-003  | -1.80E-001 | -3.13E-002 | -2.03E-001 |
| Ru-C3  | -8.33E-006 | -8.29E-003 | -2.29E-001 | -3.22E-002 | -2.70E-001 | Ru-C3  | -2.18E-006 | -8.75E-003 | -2.34E-001 | -3.21E-002 | -2.74E-001 |
| Ru-C4  | -3.54E-006 | 9.73E-003  | -1.74E-001 | -3.14E-002 | -1.96E-001 | Ru-C4  | 5.25E-006  | 9.81E-003  | -1.80E-001 | -3.13E-002 | -2.02E-001 |
| Ru-C5  | -7.34E-006 | 1.34E-004  | -3.43E-001 | -3.22E-002 | -3.75E-001 | Ru-C5  | 0.00E+000  | -5.09E-004 | -3.47E-001 | -3.21E-002 | -3.80E-001 |
| Ru-C6  | -8.31E-006 | -9.04E-003 | -2.28E-001 | -3.22E-002 | -2.69E-001 | Ru-C6  | -2.17E-006 | -9.54E-003 | -2.32E-001 | -3.21E-002 | -2.74E-001 |
| Ru-C7  | -7.33E-006 | 9.98E-004  | -3.44E-001 | -3.22E-002 | -3.75E-001 | Ru-C7  | 0.00E+000  | -3.48E-001 | -3.21E-002 | -3.79E-001 |            |
| Ru-N10 | -3.37E-006 | 1.11E-002  | -1.07E-001 | -1.34E-002 | -1.09E-002 | Ru-N10 | 0.00E+000  | 1.10E-002  | -1.10E-001 | -1.33E-002 | -1.13E-002 |

|        |            |            |            |            |            |            |           |            |            |            |
|--------|------------|------------|------------|------------|------------|------------|-----------|------------|------------|------------|
|        | 006        |            | 001        | 002        | 001        | 0          |           | 001        | 002        | 001        |
| Ru-N13 | -3.37E-006 | 1.11E-002  | -1.07E-001 | -1.34E-002 | -1.09E-001 | 0.00E+00   | 0         | -1.10E-001 | -1.33E-002 | -1.13E-001 |
| Ru-N15 | -2.89E-006 | -1.15E-002 | -6.88E-002 | -1.47E-002 | -9.51E-002 | 0.00E+00   | 0         | -1.17E-002 | -7.21E-002 | -1.47E-002 |
|        | Complex 5  |            |            |            |            | Complex 5  |           |            |            |            |
| Ru-C18 | -6.68E-006 | 7.27E-003  | -2.86E-001 | -3.25E-002 | -3.11E-001 | 0.00E+00   | 0         | -2.91E-001 | -3.24E-002 | -3.17E-001 |
| Ru-C20 | -7.65E-006 | -5.87E-003 | -2.02E-001 | -3.24E-002 | -2.40E-001 | 0.00E+00   | 0         | -6.18E-003 | -2.07E-001 | -3.23E-002 |
| Ru-C22 | -6.70E-006 | 6.32E-003  | -2.86E-001 | -3.25E-002 | -3.12E-001 | 0.00E+00   | 0         | -2.91E-001 | -3.24E-002 | -3.17E-001 |
| Ru-C23 | -2.90E-006 | 1.57E-002  | -1.33E-001 | -3.14E-002 | -1.49E-001 | 4.56E-006  | 1.59E-002 | -1.40E-001 | -3.13E-002 | -1.55E-001 |
| Ru-C26 | -7.62E-006 | -5.40E-003 | -2.02E-001 | -3.24E-002 | -2.40E-001 | 0.00E+00   | 0         | -5.95E-003 | -2.07E-001 | -3.23E-002 |
| Ru-C27 | -2.93E-006 | 1.49E-002  | -1.33E-001 | -3.14E-002 | -1.50E-001 | 4.62E-006  | 1.54E-002 | -1.40E-001 | -3.13E-002 | -1.56E-001 |
| Ru-N14 | -3.40E-006 | 1.07E-002  | -1.97E-002 | -1.33E-002 | -2.23E-002 | -1.06E-006 | 1.08E-002 | -2.29E-002 | -1.33E-002 | -2.54E-002 |
| Ru-N15 | -3.65E-006 | -1.37E-002 | -1.20E-002 | -1.51E-002 | -4.08E-002 | 0.00E+00   | 0         | -1.41E-002 | -1.94E-002 | -1.50E-002 |
| Ru-N21 | -3.39E-006 | 1.07E-002  | -2.23E-002 | -1.33E-002 | -2.50E-002 | -1.08E-006 | 1.08E-002 | -2.54E-002 | -1.33E-002 | -2.79E-002 |

Table S3: The atomic NMR magnetazability and shielding for the selected atoms in the complexes using combined basis set DGDZVP(Ru)|6-31+G(d,p)

| Complex 1 |          |          |          |          |                           |          |                          |          |                           |          |                          |          |                           |          |          |
|-----------|----------|----------|----------|----------|---------------------------|----------|--------------------------|----------|---------------------------|----------|--------------------------|----------|---------------------------|----------|----------|
| q(A)      | Vol(A),  |          | DI(A,A'  |          | $\chi_{\text{intra\_Is}}$ |          | $\chi_{\text{bond\_Is}}$ |          | $\chi_{\text{intra\_Is}}$ |          | $\sigma_{\text{Iso}}(A,$ |          | $\sigma_{\text{Iso}}(A',$ |          | Isotrop  |
|           | 0.001    | L(A)     | K(A)     | LI(A)    | )/2                       | o        | o                        | o(A)     | Mu(A)                     | A)       | A)                       | A)       | $\sigma_{\text{Iso}}(A)$  | ic       | opy      |
| Ru1       | 9.50E-01 | 1.01E+02 | 6.36E-04 | 4.44E+03 | 4.05E+01                  | 2.54E+00 | 2.24E+01                 | 2.27E+01 | -3.35E-01                 | 1.20E+00 | 3.51E+03                 | 2.52E+01 | 3.49E+03                  | 3.49E+03 | 6.16E+03 |

|           |           |          |           |          |          |          |           |          |          |          |          |          |          |          |          |
|-----------|-----------|----------|-----------|----------|----------|----------|-----------|----------|----------|----------|----------|----------|----------|----------|----------|
|           |           | -        | -         | -        |          |          |           |          |          |          |          |          |          |          |          |
| C9        | -6.26E-02 | 7.38E+01 | -5.40E-05 | 3.78E+01 | 3.97E+00 | 2.09E+00 | 3.09E+00  | 4.98E+00 | 8.07E+00 | 9.26E-02 | 8.50E+01 | 2.29E+01 | 1.08E+02 | 1.08E+02 | 1.28E+02 |
|           |           |          |           |          |          |          |           |          |          |          |          |          |          |          |          |
|           |           | -        | -         | -        |          |          |           |          |          |          |          |          |          |          |          |
| C10       | -4.68E-02 | 7.14E+01 | -3.51E-04 | 3.78E+01 | 3.96E+00 | 2.09E+00 | 2.65E+00  | 9.19E+00 | 1.18E+01 | 6.08E-02 | 7.30E+01 | 2.35E+01 | 9.65E+01 | 9.65E+01 | 1.35E+02 |
|           |           |          |           |          |          |          |           |          |          |          |          |          |          |          |          |
|           |           | -        | -         | -        |          |          |           |          |          |          |          |          |          |          |          |
| C13       | -4.96E-02 | 7.16E+01 | 7.50E-05  | 3.78E+01 | 3.96E+00 | 2.09E+00 | 2.68E+00  | 9.21E+00 | 1.19E+01 | 1.02E-01 | 7.55E+01 | 2.33E+01 | 9.88E+01 | 9.88E+01 | 1.31E+02 |
|           |           |          |           |          |          |          |           |          |          |          |          |          |          |          |          |
|           |           | -        | -         | -        |          |          |           |          |          |          |          |          |          |          |          |
| C16       | -5.13E-02 | 7.37E+01 | -1.58E-04 | 3.78E+01 | 3.97E+00 | 2.08E+00 | 3.09E+00  | 4.90E+00 | 7.99E+00 | 5.52E-02 | 8.44E+01 | 2.30E+01 | 1.07E+02 | 1.07E+02 | 1.32E+02 |
|           |           |          |           |          |          |          |           |          |          |          |          |          |          |          |          |
|           |           | -        | -         | -        |          |          |           |          |          |          |          |          |          |          |          |
| C18       | -5.82E-02 | 7.48E+01 | -1.32E-04 | 3.78E+01 | 3.98E+00 | 2.08E+00 | 3.22E+00  | 4.95E+00 | 8.17E+00 | 6.78E-02 | 8.75E+01 | 2.35E+01 | 1.11E+02 | 1.11E+02 | 1.27E+02 |
|           |           |          |           |          |          |          |           |          |          |          |          |          |          |          |          |
|           |           | -        | -         | -        |          |          |           |          |          |          |          |          |          |          |          |
| C19       | -2.85E-02 | 6.99E+01 | 6.90E-05  | 3.78E+01 | 3.95E+00 | 2.08E+00 | 2.34E+00  | 9.02E+00 | 1.14E+01 | 1.02E-01 | 6.40E+01 | 2.25E+01 | 8.65E+01 | 8.65E+01 | 1.51E+02 |
|           |           |          |           |          |          |          |           |          |          |          |          |          |          |          |          |
|           |           | -        | -         | -        |          |          |           |          |          |          |          |          |          |          |          |
| Cl22      | -5.27E-01 | 2.32E+02 | 8.30E-05  | 4.59E+02 | 1.69E+01 | 6.46E+01 | 2.15E+01  | 3.69E+00 | 2.52E+01 | 1.29E+00 | 1.06E+03 | 4.24E+00 | 1.06E+03 | 1.06E+03 | 5.20E+02 |
|           |           |          |           |          |          |          |           |          |          |          |          |          |          |          |          |
|           |           | -        | -         | -        |          |          |           |          |          |          |          |          |          |          |          |
| N12       | -7.59E-01 | 7.81E+01 | 2.16E-04  | 5.48E+01 | 5.90E+00 | 1.86E+00 | 3.51E+00  | 6.63E+00 | 1.01E+01 | 6.58E-01 | 3.46E+00 | 1.70E+01 | 1.35E+01 | 1.35E+01 | 1.92E+02 |
|           |           |          |           |          |          |          |           |          |          |          |          |          |          |          |          |
|           |           | -        | -         | -        |          |          |           |          |          |          |          |          |          |          |          |
| N17       | -7.59E-01 | 7.80E+01 | 2.41E-04  | 5.48E+01 | 5.90E+00 | 1.86E+00 | 3.50E+00  | 6.64E+00 | 1.01E+01 | 6.17E-01 | 3.94E+00 | 1.69E+01 | 1.29E+01 | 1.29E+01 | 1.93E+02 |
|           |           |          |           |          |          |          |           |          |          |          |          |          |          |          |          |
|           |           | -        | -         | -        |          |          |           |          |          |          |          |          |          |          |          |
| O2        | 1.17E+00  | 1.30E+02 | 8.20E-05  | 7.54E+01 | 8.23E+00 | 9.47E-01 | 6.12E+00  | 3.48E+00 | 9.60E+00 | 1.03E+00 | 9.64E+01 | 2.41E+00 | 9.40E+01 | 9.40E+01 | 5.67E+02 |
|           |           |          |           |          |          |          |           |          |          |          |          |          |          |          |          |
|           |           | -        | -         | -        |          |          |           |          |          |          |          |          |          |          |          |
| H24       | 1.23E-01  | 4.05E+01 | 2.40E-05  | 5.68E-01 | 3.45E-01 | 5.32E-01 | -9.18E-01 | 1.36E+00 | 2.28E+00 | 4.80E-01 | 1.77E+01 | 5.68E+00 | 2.33E+01 | 2.33E+01 | 6.65E+00 |
|           |           |          |           |          |          |          |           |          |          |          |          |          |          |          |          |
|           |           | -        | -         | -        |          |          |           |          |          |          |          |          |          |          |          |
| H29       | 1.23E-01  | 4.06E+01 | 2.60E-05  | 5.68E-01 | 3.45E-01 | 5.32E-01 | -9.20E-01 | 1.36E+00 | 2.29E+00 | 4.92E-01 | 1.77E+01 | 5.67E+00 | 2.33E+01 | 2.33E+01 | 6.63E+00 |
|           |           |          |           |          |          |          |           |          |          |          |          |          |          |          |          |
| Complex 2 |           |          |           |          |          |          |           |          |          |          |          |          |          |          |          |
|           |           | -        | -         | -        |          |          |           |          |          |          |          |          |          |          |          |
| Ru1       | 9.59E-01  | 1.04E+02 | 2.47E-04  | 4.44E+03 | 4.05E+01 | 2.57E+00 | 2.00E+01  | 2.28E+01 | 2.79E+00 | 1.18E+00 | 3.12E+03 | 2.45E+01 | 3.09E+03 | 3.09E+03 | 5.61E+03 |
|           |           |          |           |          |          |          |           |          |          |          |          |          |          |          |          |
|           |           | -        | -         | -        |          |          |           |          |          |          |          |          |          |          |          |
| C7        | -5.32E-01 | 7.01E+01 | -2.27E-01 | 3.78E+01 | 3.96E+00 | 2.09E+00 | 2.53E+00  | 9.07E+00 | 1.16E+01 | 6.14E-01 | 6.95E+01 | 2.28E+01 | 9.23E+01 | 9.23E+01 | 1.38E+02 |



|           |           |          |           |          |          |          |           |          |          |          |          |          |          |          |          |
|-----------|-----------|----------|-----------|----------|----------|----------|-----------|----------|----------|----------|----------|----------|----------|----------|----------|
|           | 02        | 01       | 04        | 01       | 00       | 00       | 00        | 00       | 01       | 02       | 01       | 01       | 01       | 01       | 02       |
|           |           |          |           |          |          |          | -         | -        | -        |          |          |          |          |          |          |
| C8        | -6.29E-02 | 7.46E+01 | 9.20E-05  | 3.78E+01 | 3.98E+00 | 2.08E+00 | 3.26E+00  | 4.86E+00 | 8.12E+00 | 8.23E-02 | 8.88E+01 | 2.26E+01 | 1.11E+02 | 1.11E+02 | 1.30E+02 |
|           |           |          |           |          |          |          | -         | -        | -        |          |          |          |          |          |          |
| C13       | -5.29E-02 | 7.64E+01 | -6.00E-06 | 3.78E+01 | 3.97E+00 | 2.08E+00 | 3.20E+00  | 4.90E+00 | 8.10E+00 | 7.84E-02 | 8.70E+01 | 2.27E+01 | 1.10E+02 | 1.10E+02 | 1.30E+02 |
|           |           |          |           |          |          |          | -         | -        | -        |          |          |          |          |          |          |
| C14       | -2.67E-02 | 6.96E+01 | -5.71E-04 | 3.78E+01 | 3.95E+00 | 2.08E+00 | 2.13E+00  | 8.85E+00 | 1.10E+01 | 9.18E-02 | 5.83E+01 | 2.19E+01 | 8.02E+01 | 8.02E+01 | 1.57E+02 |
|           |           |          |           |          |          |          | -         | -        | -        |          |          |          |          |          |          |
| C18       | -5.42E-02 | 7.02E+01 | -8.17E-04 | 3.78E+01 | 3.96E+00 | 2.09E+00 | 2.53E+00  | 9.07E+00 | 1.16E+01 | 9.29E-02 | 6.96E+01 | 2.29E+01 | 9.24E+01 | 9.24E+01 | 1.37E+02 |
|           |           |          |           |          |          |          | -         | -        | -        |          |          |          |          |          |          |
| C19       | -6.30E-02 | 7.46E+01 | 9.00E-05  | 3.78E+01 | 3.98E+00 | 2.08E+00 | 3.26E+00  | 4.86E+00 | 8.12E+00 | 7.40E-02 | 8.89E+01 | 2.26E+01 | 1.11E+02 | 1.11E+02 | 1.30E+02 |
|           |           |          |           |          |          |          | -         | -        | -        |          |          |          |          |          |          |
| Cl10      | -5.21E-01 | 2.37E+02 | 8.60E-05  | 4.59E+02 | 1.69E+01 | 6.23E+01 | 2.20E+01  | 3.76E+00 | 2.57E+01 | 1.26E+00 | 1.10E+03 | 4.72E+00 | 1.10E+03 | 1.10E+03 | 4.20E+02 |
|           |           |          |           |          |          |          | -         | -        | -        |          |          |          |          |          |          |
| N11       | 1.22E+00  | 8.21E+01 | 8.40E-05  | 5.51E+01 | 6.36E+00 | 1.86E+00 | 3.55E+00  | 7.30E+00 | 1.09E+01 | 5.42E-01 | 3.05E+01 | 1.29E+01 | 1.76E+01 | 1.76E+01 | 3.87E+02 |
|           |           |          |           |          |          |          | -         | -        | -        |          |          |          |          |          |          |
| N16       | 1.22E+00  | 8.21E+01 | 1.68E-04  | 5.51E+01 | 6.36E+00 | 1.86E+00 | 3.54E+00  | 7.32E+00 | 1.09E+01 | 5.10E-01 | 3.11E+01 | 1.29E+01 | 1.82E+01 | 1.82E+01 | 3.89E+02 |
|           |           |          |           |          |          |          | -         | -        | -        |          |          |          |          |          |          |
| H34       | 8.99E-02  | 4.09E+01 | 8.10E-05  | 5.87E-01 | 3.64E-01 | 5.46E-01 | -9.14E-01 | 1.27E+00 | 2.19E+00 | 6.96E-02 | 1.82E+01 | 4.25E+00 | 2.25E+01 | 2.25E+01 | 1.07E+01 |
|           |           |          |           |          |          |          | -         | -        | -        |          |          |          |          |          |          |
| H38       | 9.65E-02  | 4.10E+01 | 5.80E-05  | 5.81E-01 | 3.59E-01 | 5.45E-01 | -9.15E-01 | 1.28E+00 | 2.19E+00 | 5.34E-02 | 1.81E+01 | 4.22E+00 | 2.23E+01 | 2.23E+01 | 1.01E+01 |
|           |           |          |           |          |          |          |           |          |          |          |          |          |          |          |          |
| Complex 3 |           |          |           |          |          |          |           |          |          |          |          |          |          |          |          |
|           |           |          |           |          |          |          | -         | -        | -        |          |          |          |          |          |          |
| Ru1       | 9.55E-01  | 9.99E+01 | 3.57E-04  | 4.44E+03 | 4.05E+01 | 2.52E+00 | 2.45E+01  | 2.56E+01 | 1.05E+00 | 8.40E-01 | 3.76E+03 | 2.39E+01 | 3.73E+03 | 3.73E+03 | 6.00E+03 |
|           |           |          |           |          |          |          | -         | -        | -        |          |          |          |          |          |          |
| C13       | -4.01E-02 | 7.06E+01 | -1.19E-04 | 3.78E+01 | 3.96E+00 | 2.08E+00 | 2.72E+00  | 6.38E+00 | 9.11E+00 | 8.08E-02 | 7.46E+01 | 2.26E+01 | 9.72E+01 | 9.72E+01 | 1.39E+02 |
|           |           |          |           |          |          |          | -         | -        | -        |          |          |          |          |          |          |
| C14       | -4.85E-02 | 6.98E+01 | -1.15E-04 | 3.79E+01 | 3.97E+00 | 2.08E+00 | 2.69E+00  | 6.81E+00 | 9.50E+00 | 4.00E-01 | 7.44E+01 | 2.31E+01 | 9.75E+01 | 9.75E+01 | 1.39E+02 |

|           |           |          |           |          |          |          |           |          |          |          |          |          |          |          |          |
|-----------|-----------|----------|-----------|----------|----------|----------|-----------|----------|----------|----------|----------|----------|----------|----------|----------|
|           |           | -        | -         | -        |          |          |           |          |          |          |          |          |          |          |          |
| C18       | -3.97E-02 | 7.07E+01 | -9.40E-05 | 3.78E+01 | 3.96E+00 | 2.08E+00 | 2.69E+00  | 6.38E+00 | 9.06E+00 | 8.56E-02 | 7.35E+01 | 2.26E+01 | 9.61E+01 | 9.61E+01 | 1.40E+02 |
|           |           |          |           |          |          |          |           |          |          |          |          |          |          |          |          |
| C21       | -5.97E-02 | 7.36E+01 | -6.60E-05 | 3.78E+01 | 3.97E+00 | 2.09E+00 | 2.89E+00  | 6.48E+00 | 9.37E+00 | 1.32E-01 | 7.88E+01 | 2.31E+01 | 1.02E+02 | 1.02E+02 | 1.34E+02 |
|           |           |          |           |          |          |          |           |          |          |          |          |          |          |          |          |
| C23       | -5.00E-02 | 7.02E+01 | -1.81E-04 | 3.79E+01 | 3.97E+00 | 2.08E+00 | 2.73E+00  | 6.81E+00 | 9.53E+00 | 4.12E-01 | 7.53E+01 | 2.31E+01 | 9.84E+01 | 9.84E+01 | 1.39E+02 |
|           |           |          |           |          |          |          |           |          |          |          |          |          |          |          |          |
| C25       | -5.93E-02 | 7.33E+01 | -2.62E-04 | 3.78E+01 | 3.97E+00 | 2.09E+00 | 2.87E+00  | 6.46E+00 | 9.33E+00 | 1.40E-01 | 7.81E+01 | 2.32E+01 | 1.01E+02 | 1.01E+02 | 1.34E+02 |
|           |           |          |           |          |          |          |           |          |          |          |          |          |          |          |          |
| Cl7       | -5.33E-01 | 2.36E+02 | 1.08E-04  | 4.59E+02 | 1.69E+01 | 6.31E+01 | 2.18E+01  | 3.57E+00 | 2.54E+01 | 1.30E+00 | 1.08E+03 | 4.16E+00 | 1.09E+03 | 1.09E+03 | 5.79E+02 |
|           |           |          |           |          |          |          |           |          |          |          |          |          |          |          |          |
| N10       | 1.20E+00  | 8.30E+01 | 2.90E-04  | 5.50E+01 | 6.36E+00 | 1.84E+00 | 3.65E+00  | 7.31E+00 | 1.10E+01 | 9.47E-01 | 2.31E+01 | 1.21E+01 | 1.11E+01 | 1.11E+01 | 3.83E+02 |
|           |           |          |           |          |          |          |           |          |          |          |          |          |          |          |          |
| N16       | 1.20E+00  | 8.30E+01 | 8.80E-05  | 5.50E+01 | 6.36E+00 | 1.84E+00 | 3.65E+00  | 7.31E+00 | 1.10E+01 | 9.12E-01 | 2.24E+01 | 1.21E+01 | 1.03E+01 | 1.03E+01 | 3.81E+02 |
|           |           |          |           |          |          |          |           |          |          |          |          |          |          |          |          |
| O2        | 1.19E+00  | 1.28E+02 | 1.16E-04  | 7.54E+01 | 8.22E+00 | 9.69E+01 | 6.05E+00  | 2.15E+00 | 8.20E+00 | 9.26E-01 | 8.06E+01 | 2.34E+00 | 7.83E+01 | 7.83E+01 | 5.28E+02 |
|           |           |          |           |          |          |          |           |          |          |          |          |          |          |          |          |
| O28       | 1.19E+00  | 1.28E+02 | 1.27E-04  | 7.54E+01 | 8.23E+00 | 9.67E+01 | 6.07E+00  | 2.15E+00 | 8.22E+00 | 9.10E-01 | 8.12E+01 | 2.31E+00 | 7.89E+01 | 7.89E+01 | 5.26E+02 |
|           |           |          |           |          |          |          |           |          |          |          |          |          |          |          |          |
| H31       | 1.12E-01  | 3.92E+01 | -2.90E-05 | 5.80E-01 | 3.48E-01 | 5.39E-01 | -9.26E-01 | 1.24E+00 | 2.16E+00 | 3.59E-01 | 1.82E+01 | 6.49E+00 | 2.47E+01 | 2.47E+01 | 6.46E+00 |
|           |           |          |           |          |          |          |           |          |          |          |          |          |          |          |          |
| H36       | 1.17E-01  | 3.87E+01 | 2.90E-05  | 5.79E-01 | 3.45E-01 | 5.39E-01 | -9.12E-01 | 1.23E+00 | 2.15E+00 | 3.62E-01 | 1.81E+01 | 6.49E+00 | 2.46E+01 | 2.46E+01 | 6.83E+00 |
|           |           |          |           |          |          |          |           |          |          |          |          |          |          |          |          |
| Complex 4 |           |          |           |          |          |          |           |          |          |          |          |          |          |          |          |
|           |           |          |           |          |          |          |           |          |          |          |          |          |          |          |          |
| Ru1       | 9.92E-01  | 1.10E+02 | -9.65E-04 | 4.43E+03 | 4.06E+01 | 2.46E+00 | 2.65E+01  | 2.59E+01 | 5.96E-01 | 3.99E-01 | 4.14E+03 | 2.40E+01 | 4.12E+03 | 4.12E+03 | 6.61E+03 |
|           |           |          |           |          |          |          |           |          |          |          |          |          |          |          |          |
| C2        | -4.55E-02 | 7.33E+01 | 1.09E-04  | 3.78E+01 | 3.97E+00 | 2.08E+00 | 2.80E+00  | 6.45E+00 | 9.25E+00 | 6.59E-02 | 7.44E+01 | 2.23E+01 | 9.67E+01 | 9.67E+01 | 1.37E+02 |
|           |           |          |           |          |          |          |           |          |          |          |          |          |          |          |          |
| C3        | -4.44E-01 | 7.07E+01 | -1.18E-01 | 3.78E+01 | 3.96E+00 | 2.08E+00 | 2.70E+00  | 6.37E+00 | 9.07E+00 | 6.64E-01 | 7.52E+01 | 2.36E+01 | 9.87E+01 | 9.87E+01 | 1.40E+02 |



|     |         |        |         |        |        |        |        |        |        |        |        |        |         |         |        |
|-----|---------|--------|---------|--------|--------|--------|--------|--------|--------|--------|--------|--------|---------|---------|--------|
|     |         | -      | -       | -      |        |        |        |        |        |        |        |        |         |         |        |
|     | -4.90E- | 7.29E+ | -1.03E- | 3.78E+ | 3.97E+ | 2.08E+ | 2.71E+ | 3.64E+ | 6.35E+ | 1.07E- | 7.11E+ | 2.16E+ | 9.26E+  | 9.26E+  | 1.43E+ |
| C27 | 02      | 01     | 04      | 01     | 00     | 00     | 00     | 00     | 00     | 01     | 01     | 01     | 01      | 01      | 02     |
|     | -       |        |         |        |        |        |        |        |        |        |        |        |         |         |        |
|     | 1.23E+  | 8.58E+ | 2.21E-  | 5.50E+ | 6.40E+ | 1.83E+ | 3.88E+ | 7.35E+ | 1.12E+ | 4.62E- | 1.31E+ | 1.19E+ | 1.24E+  | 1.24E+  | 3.37E+ |
| N14 | 00      | 01     | 04      | 01     | 00     | 00     | 00     | 00     | 01     | 01     | 01     | 01     | 00      | 00      | 02     |
|     | -       |        |         |        |        |        |        |        |        |        |        |        |         |         |        |
|     | 1.23E+  | 7.90E+ | 4.56E-  | 5.51E+ | 6.35E+ | 1.88E+ | 3.71E+ | 7.16E+ | 1.09E+ | 2.32E- | 1.01E+ | 1.22E+ | 2.12E+  | 2.12E+  | 3.05E+ |
| N15 | 00      | 01     | 04      | 01     | 00     | 00     | 00     | 00     | 01     | 01     | 01     | 01     | 00      | 00      | 02     |
|     | -       |        |         |        |        |        |        |        |        |        |        |        |         |         |        |
|     | 1.23E+  | 8.58E+ | 2.75E-  | 5.50E+ | 6.40E+ | 1.83E+ | 3.89E+ | 7.37E+ | 1.13E+ | 3.70E- | 1.23E+ | 1.19E+ | -4.32E- | -4.31E- | 3.35E+ |
| N21 | 00      | 01     | 04      | 01     | 00     | 00     | 00     | 00     | 01     | 01     | 01     | 01     | 01      | 01      | 02     |

q(A) is total charge on atom A, Vol(A) is the volume bounded by an isosurface of the electron density distribution (0.001) and by interatomic surfaces of atom A; K(A) is electronic kinetic energy of atom A (Hamiltonian Form), Loc(A) is number of electrons localized in atom A, K\_Scaled(A) is approximation to virial-based total energy of atom A, DI(A,A') is number of electron delocalization from atom A,  $\chi_{\text{intra\_iso}}$  is intraatomic magnetizability contribution of atom A (cgs-ppm);  $\chi_{\text{bond\_iso}}$  is bonding magnetizability contribution of atom A;  $\chi_{\text{iso}}$  is total magnetizability contribution of atom A (i.e. magnetizability isotropic); Mu(A) is total dipole moment contribution of atom A;  $\sigma_{\text{iso}}(\text{A},\text{A})$  is the intraatomic shielding tensor;  $\sigma_{\text{iso}}(\text{A}',\text{A})$  is total induced magnetic field on nucleus a by other nuclei A';  $\sigma_{\text{iso}}(\text{A})$  is total magnetic shielding tensor of atom A (i.e. nmr shielding isotropic).

Table S4: The atomic NMR magnetazability and shielding for the selected atoms in the complexes using combined basis sets 3-21G

| Complex 1 |         |        |         |        |        |            |                                    |                                   |                         |        |                                          |                                                                              |               |                |        |
|-----------|---------|--------|---------|--------|--------|------------|------------------------------------|-----------------------------------|-------------------------|--------|------------------------------------------|------------------------------------------------------------------------------|---------------|----------------|--------|
|           | Vol(A), |        |         |        |        |            |                                    |                                   |                         |        |                                          |                                                                              |               |                |        |
|           | q(A)    | 0.001  | L(A)    | K(A)   | LI(A)  | DI(A,A')/2 | $\chi_{\text{intra\_iso}}$<br>o(A) | $\chi_{\text{bond\_iso}}$<br>o(A) | $\chi_{\text{iso}}$ (A) | Mu(A)  | $\sigma_{\text{iso}}(\text{A},\text{A})$ | $\sigma_{\text{iso}}(\text{A}',\text{A})$<br>$\sigma_{\text{iso}}(\text{A})$ | Isotrop<br>ic | Anisotr<br>opy |        |
|           |         |        |         |        |        |            |                                    | -                                 |                         |        | -                                        |                                                                              | -             |                |        |
|           | 8.63E-  | 9.73E+ | 5.52E-  | 4.40E+ | 4.07E+ | 2.46E+     | 2.47E+                             | 2.50E+                            | -2.65E-                 | 1.19E+ | 3.10E+                                   | 2.41E+                                                                       | 3.07E+        | 3.07E+         | 6.03E+ |
| Ru1       | 01      | 01     | 04      | 03     | 01     | 00         | 01                                 | 01                                | 01                      | 00     | 03                                       | 01                                                                           | 03            | 03             | 03     |
|           |         |        |         |        |        |            |                                    | -                                 |                         |        |                                          |                                                                              |               |                |        |
|           | -1.14E- | 7.66E+ | -7.00E- | 3.76E+ | 4.04E+ | 2.08E+     | 3.64E+                             | 6.30E+                            | 9.95E+                  | 1.35E- | 1.04E+                                   | 2.27E+                                                                       | 1.26E+        | 1.26E+         | 1.19E+ |
| C9        | 01      | 01     | 05      | 01     | 00     | 00         | 00                                 | 00                                | 00                      | 01     | 02                                       | 01                                                                           | 02            | 02             | 02     |
|           |         |        |         |        |        |            |                                    | -                                 |                         |        |                                          |                                                                              |               |                |        |
|           | -1.04E- | 7.49E+ | -1.97E- | 3.76E+ | 4.03E+ | 2.07E+     | 3.35E+                             | 6.23E+                            | 9.58E+                  | 9.47E- | 9.56E+                                   | 2.30E+                                                                       | 1.19E+        | 1.19E+         | 1.24E+ |
| C10       | 01      | 01     | 04      | 01     | 00     | 00         | 00                                 | 00                                | 00                      | 02     | 01                                       | 01                                                                           | 02            | 02             | 02     |
|           |         |        |         |        |        |            |                                    | -                                 |                         |        |                                          |                                                                              |               |                |        |
|           | -1.09E- | 7.52E+ | -1.11E- | 3.76E+ | 4.03E+ | 2.08E+     | 3.37E+                             | 6.24E+                            | 9.61E+                  | 1.16E- | 9.77E+                                   | 2.28E+                                                                       | 1.20E+        | 1.20E+         | 1.21E+ |
| C13       | 01      | 01     | 04      | 01     | 00     | 00         | 00                                 | 00                                | 00                      | 01     | 01                                       | 01                                                                           | 02            | 02             | 02     |

|           |           |          |           |          |          |          |           |           |          |          |          |          |          |          |          |
|-----------|-----------|----------|-----------|----------|----------|----------|-----------|-----------|----------|----------|----------|----------|----------|----------|----------|
|           |           | -        | -         | -        |          |          |           |           |          |          |          |          |          |          |          |
| C16       | -9.09E-02 | 7.57E+01 | -5.60E-05 | 3.76E+01 | 4.02E+00 | 2.07E+00 | 3.52E+00  | 6.13E+00  | 9.66E+00 | 9.32E-02 | 1.00E+02 | 2.24E+01 | 1.23E+02 | 1.23E+02 | 1.26E+02 |
|           |           |          |           |          |          |          |           |           |          |          |          |          |          |          |          |
| C18       | -1.04E-01 | 7.71E+01 | -4.80E-05 | 3.76E+01 | 4.04E+00 | 2.07E+00 | 3.71E+00  | 6.23E+00  | 9.94E+00 | 1.14E-01 | 1.04E+02 | 2.30E+01 | 1.27E+02 | 1.27E+02 | 1.21E+02 |
|           |           |          |           |          |          |          |           |           |          |          |          |          |          |          |          |
| C19       | -8.40E-02 | 7.33E+01 | -1.10E-04 | 3.76E+01 | 4.02E+00 | 2.07E+00 | 3.05E+00  | 6.06E+00  | 9.11E+00 | 9.99E-02 | 8.86E+01 | 2.21E+01 | 1.11E+02 | 1.11E+02 | 1.35E+02 |
|           |           |          |           |          |          |          |           |           |          |          |          |          |          |          |          |
| Cl22      | -4.89E-01 | 2.29E+02 | 6.20E-05  | 4.57E+02 | 1.69E+01 | 6.10E+01 | 2.15E+01  | 3.19E+00  | 2.47E+01 | 1.33E+00 | 9.98E+02 | 3.76E+00 | 1.00E+03 | 1.00E+03 | 4.24E+02 |
|           |           |          |           |          |          |          |           |           |          |          |          |          |          |          |          |
| N12       | -6.13E-01 | 7.39E+01 | 4.00E-05  | 5.43E+01 | 5.75E+00 | 1.86E+00 | 3.74E+00  | 6.36E+00  | 1.01E+01 | 6.53E-01 | 2.36E+01 | 1.74E+01 | 4.10E+01 | 4.10E+01 | 1.58E+02 |
|           |           |          |           |          |          |          |           |           |          |          |          |          |          |          |          |
| N17       | -6.03E-01 | 7.39E+01 | 1.41E-04  | 5.43E+01 | 5.74E+00 | 1.86E+00 | 3.68E+00  | 6.52E+00  | 1.02E+01 | 8.83E-01 | 1.93E+01 | 1.74E+01 | 3.66E+01 | 3.66E+01 | 1.68E+02 |
|           |           |          |           |          |          |          |           |           |          |          |          |          |          |          |          |
| O2        | -8.53E-01 | 1.04E+02 | 8.40E-05  | 7.47E+01 | 7.78E+00 | 1.07E+00 | 5.00E+00  | 2.28E+00  | 7.27E+00 | 9.06E-01 | 9.86E+01 | 4.65E+00 | 9.40E+01 | 9.40E+01 | 5.71E+02 |
|           |           |          |           |          |          |          |           |           |          |          |          |          |          |          |          |
| H24       | 2.00E-01  | 3.41E+01 | 3.70E-05  | 5.27E+01 | 2.92E-01 | 5.07E+01 | -8.31E-01 | -9.37E-01 | 1.77E+00 | 4.44E-01 | 1.80E+01 | 5.96E+00 | 2.40E+01 | 2.40E+01 | 6.47E+00 |
|           |           |          |           |          |          |          |           |           |          |          |          |          |          |          |          |
| H29       | 1.55E-01  | 3.93E+01 | 4.10E-05  | 5.43E+01 | 3.30E-01 | 5.14E+01 | -9.62E-01 | -4.06E-01 | 1.37E+00 | 3.57E-02 | 1.90E+01 | 6.38E+00 | 2.54E+01 | 2.54E+01 | 5.79E+00 |
|           |           |          |           |          |          |          |           |           |          |          |          |          |          |          |          |
| Complex 2 |           |          |           |          |          |          |           |           |          |          |          |          |          |          |          |
|           |           |          |           |          |          |          |           |           |          |          |          |          |          |          |          |
| Ru1       | 8.62E-01  | 9.91E+01 | 4.02E-04  | 4.40E+03 | 4.06E+01 | 2.49E+00 | 2.21E+01  | 2.48E+01  | 2.66E+00 | 1.17E+00 | 2.71E+03 | 2.35E+01 | 2.69E+03 | 2.69E+03 | 5.42E+03 |
|           |           |          |           |          |          |          |           |           |          |          |          |          |          |          |          |
| C7        | -1.16E-01 | 7.31E+01 | -8.10E-05 | 3.76E+01 | 4.04E+00 | 2.08E+00 | 3.14E+00  | 6.11E+00  | 9.25E+00 | 8.08E-02 | 9.07E+01 | 2.25E+01 | 1.13E+02 | 1.13E+02 | 1.27E+02 |
|           |           |          |           |          |          |          |           |           |          |          |          |          |          |          |          |
| C8        | -1.05E-01 | 7.72E+01 | 8.60E-05  | 3.76E+01 | 4.04E+00 | 2.07E+00 | 3.83E+00  | 6.13E+00  | 9.96E+00 | 1.24E-01 | 1.07E+02 | 2.23E+01 | 1.29E+02 | 1.29E+02 | 1.23E+02 |
|           |           |          |           |          |          |          |           |           |          |          |          |          |          |          |          |
| C13       | -9.59E-02 | 7.87E+01 | 1.57E-04  | 3.76E+01 | 4.03E+00 | 2.07E+00 | 3.78E+00  | 6.21E+00  | 9.99E+00 | 1.31E-01 | 1.05E+02 | 2.24E+01 | 1.28E+02 | 1.28E+02 | 1.24E+02 |
|           |           |          |           |          |          |          |           |           |          |          |          |          |          |          |          |
| C14       | -8.33E-01 | 7.24E+01 | 7.10E-05  | 3.76E+01 | 4.02E+00 | 2.07E+00 | 2.78E+00  | 5.96E+00  | 8.74E+00 | 8.95E-01 | 8.18E+01 | 2.17E+01 | 1.03E+02 | 1.03E+02 | 1.41E+02 |

|           |           |          |           |          |          |          |           |           |          |          |          |          |          |          |          |
|-----------|-----------|----------|-----------|----------|----------|----------|-----------|-----------|----------|----------|----------|----------|----------|----------|----------|
|           | 02        | 01       | 05        | 01       | 00       | 00       | 00        | 00        | 00       | 02       | 01       | 01       | 02       | 02       | 02       |
|           |           |          |           |          |          |          | -         | -         | -        |          |          |          |          |          |          |
| C18       | -1.16E-01 | 7.32E+01 | -8.80E-05 | 3.76E+01 | 4.04E+00 | 2.08E+00 | 3.15E+00  | 6.13E+00  | 9.27E+00 | 1.08E-01 | 9.08E+01 | 2.25E+01 | 1.13E+02 | 1.13E+02 | 1.27E+02 |
|           |           |          |           |          |          |          | -         | -         | -        |          |          |          |          |          |          |
| C19       | -1.05E-01 | 7.73E+01 | 5.90E-05  | 3.76E+01 | 4.04E+00 | 2.07E+00 | 3.83E+00  | 6.15E+00  | 9.97E+00 | 1.36E-01 | 1.07E+02 | 2.23E+01 | 1.29E+02 | 1.29E+02 | 1.23E+02 |
|           |           |          |           |          |          |          | -         | -         | -        |          |          |          |          |          |          |
| Cl10      | -4.78E-01 | 2.34E+02 | 9.30E-05  | 4.57E+02 | 1.69E+01 | 5.87E-01 | 2.19E+01  | 3.41E+00  | 2.53E+01 | 1.29E+00 | 1.03E+03 | 4.26E+00 | 1.03E+03 | 1.03E+03 | 3.66E+02 |
|           |           |          |           |          |          |          | -         | -         | -        |          |          |          |          |          |          |
| N11       | -9.49E-01 | 7.74E+01 | 5.00E-05  | 5.45E+01 | 6.07E+00 | 1.88E+00 | 3.67E+00  | 6.91E+00  | 1.06E+01 | 6.40E-01 | 1.00E+00 | 1.39E+01 | 1.49E+01 | 1.49E+01 | 3.56E+02 |
|           |           |          |           |          |          |          | -         | -         | -        |          |          |          |          |          |          |
| N16       | -9.49E-01 | 7.75E+01 | 6.00E-05  | 5.45E+01 | 6.07E+00 | 1.88E+00 | 3.67E+00  | 6.90E+00  | 1.06E+01 | 6.04E-01 | 4.94E-01 | 1.39E+01 | 1.44E+01 | 1.44E+01 | 3.58E+02 |
|           |           |          |           |          |          |          | -         | -         | -        |          |          |          |          |          |          |
| H34       | 1.49E-01  | 3.72E+01 | 3.70E-05  | 5.50E-01 | 3.27E-01 | 5.25E-01 | -9.03E-01 | -4.11E-01 | 1.31E+00 | 3.97E-02 | 1.89E+01 | 4.77E+00 | 2.37E+01 | 2.37E+01 | 1.00E+01 |
|           |           |          |           |          |          |          | -         | -         | -        |          |          |          |          |          |          |
| H38       | 1.51E-01  | 3.74E+01 | 8.50E-05  | 5.47E-01 | 3.24E-01 | 5.25E-01 | -9.09E-01 | -4.18E-01 | 1.33E+00 | 4.12E-02 | 1.88E+01 | 4.70E+00 | 2.35E+01 | 2.35E+01 | 9.30E+00 |
| Complex 3 |           |          |           |          |          |          |           |           |          |          |          |          |          |          |          |
|           |           |          |           |          |          |          | -         | -         | -        |          |          |          |          |          |          |
| Ru1       | 8.73E-01  | 9.61E+01 | -6.31E-04 | 4.40E+03 | 4.07E+01 | 2.45E+00 | 2.73E+01  | 2.50E+01  | 2.30E+00 | 8.55E-01 | 3.41E+03 | 2.29E+01 | 3.38E+03 | 3.38E+03 | 5.84E+03 |
|           |           |          |           |          |          |          | -         | -         | -        |          |          |          |          |          |          |
| C13       | -7.91E-02 | 7.32E+01 | -2.80E-05 | 3.76E+01 | 4.01E+00 | 2.07E+00 | 3.29E+00  | 6.18E+00  | 9.47E+00 | 8.53E-02 | 9.47E+01 | 2.23E+01 | 1.17E+02 | 1.17E+02 | 1.29E+02 |
|           |           |          |           |          |          |          | -         | -         | -        |          |          |          |          |          |          |
| C14       | -9.33E-02 | 7.21E+01 | -4.90E-05 | 3.76E+01 | 4.02E+00 | 2.07E+00 | 3.27E+00  | 6.65E+00  | 9.92E+00 | 4.11E-01 | 9.41E+01 | 2.29E+01 | 1.17E+02 | 1.17E+02 | 1.27E+02 |
|           |           |          |           |          |          |          | -         | -         | -        |          |          |          |          |          |          |
| C18       | -8.72E-02 | 7.36E+01 | 8.60E-05  | 3.76E+01 | 4.02E+00 | 2.07E+00 | 3.26E+00  | 6.21E+00  | 9.47E+00 | 9.86E-02 | 9.37E+01 | 2.23E+01 | 1.16E+02 | 1.16E+02 | 1.29E+02 |
|           |           |          |           |          |          |          | -         | -         | -        |          |          |          |          |          |          |
| C21       | -1.18E-01 | 7.64E+01 | -3.70E-05 | 3.76E+01 | 4.04E+00 | 2.08E+00 | 3.50E+00  | 6.31E+00  | 9.81E+00 | 1.79E-01 | 9.88E+01 | 2.29E+01 | 1.22E+02 | 1.22E+02 | 1.25E+02 |
|           |           |          |           |          |          |          | -         | -         | -        |          |          |          |          |          |          |
| C23       | -9.43E-02 | 7.27E+01 | -8.40E-05 | 3.76E+01 | 4.03E+00 | 2.06E+00 | 3.35E+00  | 6.66E+00  | 1.00E+01 | 4.09E-01 | 9.62E+01 | 2.29E+01 | 1.19E+02 | 1.19E+02 | 1.29E+02 |

|           |           |          |           |          |          |          |           |          |          |          |          |          |          |          |          |
|-----------|-----------|----------|-----------|----------|----------|----------|-----------|----------|----------|----------|----------|----------|----------|----------|----------|
|           |           | -        | -         | -        |          |          |           |          |          |          |          |          |          |          |          |
| C25       | -1.17E-01 | 7.61E+01 | 1.72E-04  | 3.76E+01 | 4.04E+00 | 2.08E+00 | 3.46E+00  | 6.30E+00 | 9.76E+00 | 1.83E-01 | 9.81E+01 | 2.30E+01 | 1.21E+02 | 1.21E+02 | 1.25E+02 |
|           |           |          |           |          |          |          |           |          |          |          |          |          |          |          |          |
|           |           | -        | -         | -        |          |          |           |          |          |          |          |          |          |          |          |
| CI7       | -4.97E-01 | 2.32E+02 | 7.30E-05  | 4.57E+02 | 1.69E+01 | 5.90E+01 | 2.18E+01  | 3.20E+00 | 2.50E+01 | 1.35E+00 | 1.01E+03 | 3.77E+00 | 1.02E+03 | 1.02E+03 | 4.99E+02 |
|           |           |          |           |          |          |          |           |          |          |          |          |          |          |          |          |
|           |           | -        | -         | -        |          |          |           |          |          |          |          |          |          |          |          |
| N10       | -9.26E-01 | 7.82E+01 | 2.83E-04  | 5.44E+01 | 6.06E+00 | 1.86E+00 | 3.72E+00  | 7.07E+00 | 1.08E+01 | 9.41E-01 | 2.92E+00 | 1.31E+01 | 1.60E+01 | 1.60E+01 | 3.60E+02 |
|           |           |          |           |          |          |          |           |          |          |          |          |          |          |          |          |
|           |           | -        | -         | -        |          |          |           |          |          |          |          |          |          |          |          |
| N16       | -9.30E-01 | 7.78E+01 | 2.81E-04  | 5.45E+01 | 6.06E+00 | 1.87E+00 | 3.73E+00  | 6.99E+00 | 1.07E+01 | 9.13E-01 | 4.52E+00 | 1.31E+01 | 1.76E+01 | 1.76E+01 | 3.55E+02 |
|           |           |          |           |          |          |          |           |          |          |          |          |          |          |          |          |
|           |           | -        | -         | -        |          |          |           |          |          |          |          |          |          |          |          |
| O2        | -8.96E-01 | 1.04E+02 | 1.68E-04  | 7.47E+01 | 7.80E+00 | 1.09E+00 | 5.04E+00  | 2.27E+00 | 7.31E+00 | 9.29E-01 | 7.73E+01 | 4.31E+00 | 7.30E+01 | 7.30E+01 | 5.56E+02 |
|           |           |          |           |          |          |          |           |          |          |          |          |          |          |          |          |
|           |           | -        | -         | -        |          |          |           |          |          |          |          |          |          |          |          |
| O28       | -8.94E-01 | 1.05E+02 | 1.36E-04  | 7.47E+01 | 7.81E+00 | 1.09E+00 | 5.06E+00  | 2.21E+00 | 7.27E+00 | 8.86E-01 | 8.26E+01 | 4.19E+00 | 7.84E+01 | 7.84E+01 | 5.53E+02 |
|           |           |          |           |          |          |          |           |          |          |          |          |          |          |          |          |
|           |           | -        | -         | -        |          |          |           |          |          |          |          |          |          |          |          |
| H31       | 1.61E-01  | 3.65E+01 | 3.80E-05  | 5.47E-01 | 3.19E-01 | 5.20E-01 | -9.69E-01 | 1.06E+00 | 2.03E+00 | 3.16E-01 | 1.93E+01 | 7.78E+00 | 2.71E+01 | 2.71E+01 | 5.20E+00 |
|           |           |          |           |          |          |          |           |          |          |          |          |          |          |          |          |
|           |           | -        | -         | -        |          |          |           |          |          |          |          |          |          |          |          |
| H36       | 1.77E-01  | 3.48E+01 | 1.80E-05  | 5.41E-01 | 3.05E-01 | 5.17E-01 | -9.20E-01 | 1.05E+00 | 1.98E+00 | 3.08E-01 | 1.89E+01 | 7.65E+00 | 2.66E+01 | 2.66E+01 | 6.36E+00 |
|           |           |          |           |          |          |          |           |          |          |          |          |          |          |          |          |
| Complex 4 |           |          |           |          |          |          |           |          |          |          |          |          |          |          |          |
|           |           | -        | -         | -        |          |          |           |          |          |          |          |          |          |          |          |
| Ru1       | 9.46E-01  | 1.02E+02 | -2.96E-04 | 4.40E+03 | 4.07E+01 | 2.38E+00 | 2.97E+01  | 2.51E+01 | 4.51E+00 | 4.45E-01 | 3.77E+03 | 2.31E+01 | 3.75E+03 | 3.75E+03 | 6.50E+03 |
|           |           |          |           |          |          |          |           |          |          |          |          |          |          |          |          |
|           |           | -        | -         | -        |          |          |           |          |          |          |          |          |          |          |          |
| C2        | -9.53E-02 | 7.64E+01 | 9.40E-05  | 3.76E+01 | 4.03E+00 | 2.06E+00 | 3.39E+00  | 6.18E+00 | 9.57E+00 | 9.19E-02 | 9.45E+01 | 2.19E+01 | 1.16E+02 | 1.16E+02 | 1.28E+02 |
|           |           |          |           |          |          |          |           |          |          |          |          |          |          |          |          |
|           |           | -        | -         | -        |          |          |           |          |          |          |          |          |          |          |          |
| C3        | -9.30E-02 | 7.35E+01 | -9.30E-05 | 3.76E+01 | 4.03E+00 | 2.06E+00 | 3.29E+00  | 6.17E+00 | 9.46E+00 | 1.09E-01 | 9.52E+01 | 2.33E+01 | 1.18E+02 | 1.18E+02 | 1.32E+02 |
|           |           |          |           |          |          |          |           |          |          |          |          |          |          |          |          |
|           |           | -        | -         | -        |          |          |           |          |          |          |          |          |          |          |          |
| C4        | -9.54E-02 | 7.65E+01 | -5.80E-05 | 3.76E+01 | 4.03E+00 | 2.06E+00 | 3.40E+00  | 6.18E+00 | 9.58E+00 | 1.18E-01 | 9.46E+01 | 2.19E+01 | 1.17E+02 | 1.17E+02 | 1.28E+02 |
|           |           |          |           |          |          |          |           |          |          |          |          |          |          |          |          |
|           |           | -        | -         | -        |          |          |           |          |          |          |          |          |          |          |          |
| C5        | -8.74E-02 | 7.61E+01 | -7.70E-05 | 3.76E+01 | 4.03E+00 | 2.06E+00 | 3.50E+00  | 6.23E+00 | 9.73E+00 | 1.29E-01 | 1.01E+02 | 2.36E+01 | 1.25E+02 | 1.25E+02 | 1.26E+02 |
|           |           |          |           |          |          |          |           |          |          |          |          |          |          |          |          |
|           |           | -        | -         | -        |          |          |           |          |          |          |          |          |          |          |          |
| C6        | -9.30E-01 | 7.35E+01 | -5.60E-05 | 3.76E+01 | 4.03E+00 | 2.06E+00 | 3.28E+00  | 6.16E+00 | 9.45E+00 | 1.27E-01 | 9.49E+01 | 2.33E+01 | 1.18E+02 | 1.18E+02 | 1.32E+02 |

|           |           |          |           |          |          |          |          |          |          |          |          |          |          |          |          |
|-----------|-----------|----------|-----------|----------|----------|----------|----------|----------|----------|----------|----------|----------|----------|----------|----------|
|           | 02        | 01       | 05        | 01       | 00       | 00       | 00       | 00       | 00       | 01       | 01       | 01       | 02       | 02       | 02       |
|           |           |          |           |          |          |          | -        | -        | -        |          |          |          |          |          |          |
| C7        | -8.74E-02 | 7.61E+01 | -8.00E-05 | 3.76E+01 | 4.03E+00 | 2.06E+00 | 3.51E+00 | 6.23E+00 | 9.74E+00 | 1.46E-01 | 1.01E+02 | 2.36E+01 | 1.25E+02 | 1.25E+02 | 1.26E+02 |
|           |           |          |           |          |          |          |          |          |          |          |          |          |          |          |          |
|           |           |          |           |          |          |          | -        | -        | -        |          |          |          |          |          |          |
| N10       | -6.07E-01 | 7.84E+01 | 1.22E-04  | 5.42E+01 | 5.78E+00 | 1.82E+00 | 3.84E+00 | 6.59E+00 | 1.04E+01 | 6.51E-01 | 1.74E+01 | 1.59E+01 | 3.33E+01 | 3.33E+01 | 1.33E+02 |
|           |           |          |           |          |          |          |          |          |          |          |          |          |          |          |          |
|           |           |          |           |          |          |          | -        | -        | -        |          |          |          |          |          |          |
| N13       | -6.07E-01 | 7.84E+01 | -4.29E-04 | 5.42E+01 | 5.78E+00 | 1.82E+00 | 3.84E+00 | 6.59E+00 | 1.04E+01 | 6.36E-01 | 1.74E+01 | 1.59E+01 | 3.33E+01 | 3.33E+01 | 1.33E+02 |
|           |           |          |           |          |          |          |          |          |          |          |          |          |          |          |          |
|           |           |          |           |          |          |          | -        | -        | -        |          |          |          |          |          |          |
| N15       | -9.65E-01 | 7.53E+01 | 1.70E-04  | 5.46E+01 | 6.10E+00 | 1.86E+00 | 4.55E+00 | 6.58E+00 | 1.11E+01 | 3.83E-01 | 6.20E+01 | 1.36E+01 | 7.56E+01 | 7.56E+01 | 2.10E+02 |
|           |           |          |           |          |          |          |          |          |          |          |          |          |          |          |          |
| Complex 5 |           |          |           |          |          |          |          |          |          |          |          |          |          |          |          |
|           |           |          |           |          |          |          |          |          |          |          |          |          |          |          |          |
|           |           |          |           |          |          |          | -        | -        | -        |          |          |          |          |          |          |
| Ru1       | 9.26E-01  | 1.01E+02 | 9.21E-04  | 4.40E+03 | 4.06E+01 | 2.43E+00 | 2.82E+01 | 2.44E+01 | 3.84E+00 | 4.94E-01 | 3.57E+03 | 2.23E+01 | 3.55E+03 | 3.55E+03 | 5.25E+03 |
|           |           |          |           |          |          |          |          |          |          |          |          |          |          |          |          |
|           |           |          |           |          |          |          | -        | -        | -        |          |          |          |          |          |          |
| C18       | -8.75E-02 | 7.60E+01 | -2.80E-04 | 3.76E+01 | 4.03E+00 | 2.06E+00 | 3.44E+00 | 6.11E+00 | 9.55E+00 | 7.76E-02 | 9.92E+01 | 2.27E+01 | 1.22E+02 | 1.22E+02 | 1.29E+02 |
|           |           |          |           |          |          |          |          |          |          |          |          |          |          |          |          |
|           |           |          |           |          |          |          | -        | -        | -        |          |          |          |          |          |          |
| C20       | -9.77E-02 | 7.36E+01 | -1.45E-04 | 3.76E+01 | 4.03E+00 | 2.07E+00 | 3.26E+00 | 6.04E+00 | 9.29E+00 | 9.89E-02 | 9.45E+01 | 2.26E+01 | 1.17E+02 | 1.17E+02 | 1.32E+02 |
|           |           |          |           |          |          |          |          |          |          |          |          |          |          |          |          |
|           |           |          |           |          |          |          | -        | -        | -        |          |          |          |          |          |          |
| C22       | -8.70E-02 | 7.59E+01 | 7.70E-05  | 3.76E+01 | 4.03E+00 | 2.06E+00 | 3.43E+00 | 6.10E+00 | 9.53E+00 | 9.16E-02 | 9.91E+01 | 2.27E+01 | 1.22E+02 | 1.22E+02 | 1.29E+02 |
|           |           |          |           |          |          |          |          |          |          |          |          |          |          |          |          |
|           |           |          |           |          |          |          | -        | -        | -        |          |          |          |          |          |          |
| C23       | -1.01E-01 | 7.60E+01 | -4.40E-05 | 3.76E+01 | 4.03E+00 | 2.07E+00 | 3.31E+00 | 6.03E+00 | 9.34E+00 | 1.18E-01 | 9.15E+01 | 2.12E+01 | 1.13E+02 | 1.13E+02 | 1.33E+02 |
|           |           |          |           |          |          |          |          |          |          |          |          |          |          |          |          |
|           |           |          |           |          |          |          | -        | -        | -        |          |          |          |          |          |          |
| C26       | -9.72E-02 | 7.36E+01 | -2.40E-05 | 3.76E+01 | 4.03E+00 | 2.07E+00 | 3.26E+00 | 6.03E+00 | 9.29E+00 | 1.14E-01 | 9.46E+01 | 2.26E+01 | 1.17E+02 | 1.17E+02 | 1.32E+02 |
|           |           |          |           |          |          |          |          |          |          |          |          |          |          |          |          |
|           |           |          |           |          |          |          | -        | -        | -        |          |          |          |          |          |          |
| C27       | -1.01E-01 | 7.59E+01 | -1.10E-04 | 3.76E+01 | 4.03E+00 | 2.07E+00 | 3.30E+00 | 6.03E+00 | 9.33E+00 | 1.38E-01 | 9.13E+01 | 2.12E+01 | 1.13E+02 | 1.13E+02 | 1.33E+02 |
|           |           |          |           |          |          |          |          |          |          |          |          |          |          |          |          |
|           |           |          |           |          |          |          | -        | -        | -        |          |          |          |          |          |          |
| N14       | -9.58E-01 | 8.06E+01 | 1.32E-04  | 5.44E+01 | 6.10E+00 | 1.85E+00 | 3.97E+00 | 7.06E+00 | 1.10E+01 | 5.43E-01 | 1.27E+01 | 1.30E+01 | 2.57E+01 | 2.57E+01 | 3.17E+02 |
|           |           |          |           |          |          |          |          |          |          |          |          |          |          |          |          |
|           |           |          |           |          |          |          | -        | -        | -        |          |          |          |          |          |          |
| N15       | -9.52E-01 | 7.36E+01 | 3.41E-04  | 5.46E+01 | 6.05E+00 | 1.90E+00 | 3.79E+00 | 6.70E+00 | 1.05E+01 | 2.78E-01 | 1.69E+01 | 1.34E+01 | 3.04E+01 | 3.04E+01 | 2.83E+02 |



|     |         |        |        |        |        |        |        |        |        |        |        |        |        |        |        |
|-----|---------|--------|--------|--------|--------|--------|--------|--------|--------|--------|--------|--------|--------|--------|--------|
|     |         |        |        |        |        |        | -      | -      | -      |        |        |        |        |        |        |
| N21 | -9.59E- | 8.06E+ | 8.90E- | 5.44E+ | 6.11E+ | 1.85E+ | 3.97E+ | 7.07E+ | 1.10E+ | 4.49E- | 1.32E+ | 1.30E+ | 2.62E+ | 2.62E+ | 3.16E+ |
|     | 01      | 01     | 05     | 01     | 00     | 00     | 00     | 00     | 01     | 01     | 01     | 01     | 01     | 01     | 02     |

Table S5: The atomic NMR magnetizability and shielding for the selected atoms in the complexes using combined basis sets ECP(Ru)|6-31+G(d,p)

| Complex 1 |         |        |         |        |          |        |                            |                          |                          |        |                           |                          |        |         |         |
|-----------|---------|--------|---------|--------|----------|--------|----------------------------|--------------------------|--------------------------|--------|---------------------------|--------------------------|--------|---------|---------|
| q(A)      | Vol(A), |        |         |        | DI(A,A') |        | $\chi_{\text{intra\_Iso}}$ | $\chi_{\text{bond\_Is}}$ | $\sigma_{\text{Iso}}(A,$ |        | $\sigma_{\text{Iso}}(A',$ | Isotropi                 |        | Anisotr |         |
|           | 0.001   | L(A)   | K(A)    | Li(A)  | /2       | (A)    | (A)                        | $\chi_{\text{Iso}}(A)$   | Mu(A)                    | A)     | A)                        | $\sigma_{\text{Iso}}(A)$ | c      | opy     |         |
|           |         |        |         |        |          |        | -                          | -                        |                          |        |                           |                          |        |         | -       |
|           | 9.40E-  | 1.03E+ | 2.84E-  | 3.27E+ | 1.24E+   | 2.70E+ | 1.42E+                     | 4.48E+                   | 3.06E+                   | 1.07E+ | 1.52E+                    | 2.53E+                   | 1.55E+ | 4.41E+  | 6.61E+0 |
|           | 01      | 02     | 04      | 01     | 01       | 00     | 01                         | 01                       | 01                       | 00     | 03                        | 01                       | 03     | 02      | 2       |
|           |         |        |         |        |          |        | -                          | -                        |                          |        |                           |                          |        |         |         |
|           | -7.56E- | 7.39E+ | 2.30E-  | 3.78E+ | 3.98E+   | 2.09E+ | 3.04E+                     | 6.24E+                   | 9.29E+                   | 1.03E- | 8.71E+                    | 1.29E+                   | 1.00E+ | 1.10E+  | 1.21E+0 |
|           | 02      | 01     | 05      | 01     | 00       | 00     | 00                         | 00                       | 00                       | 01     | 01                        | 01                       | 02     | 02      | 2       |
|           |         |        |         |        |          |        | -                          | -                        |                          |        |                           |                          |        |         |         |
|           | -5.98E- | 7.16E+ | -2.78E- | 3.78E+ | 3.97E+   | 2.09E+ | 2.69E+                     | 6.57E+                   | 9.26E+                   | 5.74E- | 7.77E+                    | 7.36E+                   | 7.04E+ | 1.01E+  | 1.28E+0 |
|           | 02      | 01     | 04      | 01     | 00       | 00     | 00                         | 00                       | 00                       | 02     | 01                        | 00                       | 01     | 02      | 2       |
|           |         |        |         |        |          |        | -                          | -                        |                          |        |                           |                          |        |         |         |
|           | -6.39E- | 7.18E+ | -2.07E- | 3.78E+ | 3.97E+   | 2.09E+ | 2.75E+                     | 8.16E+                   | 1.09E+                   | 1.06E- | 8.19E+                    | 6.66E+                   | 8.85E+ | 1.05E+  | 1.23E+0 |
|           | 02      | 01     | 04      | 01     | 00       | 00     | 00                         | 00                       | 01                       | 01     | 01                        | 00                       | 01     | 02      | 2       |
|           |         |        |         |        |          |        | -                          | -                        |                          |        |                           |                          |        |         |         |
|           | -6.54E- | 7.37E+ | 1.51E-  | 3.78E+ | 3.98E+   | 2.09E+ | 3.07E+                     | 2.09E+                   | 5.16E+                   | 8.08E- | 8.69E+                    | 3.55E+                   | 5.14E+ | 1.09E+  | 1.26E+0 |
|           | 02      | 01     | 04      | 01     | 00       | 00     | 00                         | 00                       | 00                       | 02     | 01                        | 01                       | 01     | 02      | 2       |
|           |         |        |         |        |          |        | -                          | -                        |                          |        |                           |                          |        |         |         |
|           | -7.15E- | 7.47E+ | 2.20E-  | 3.78E+ | 3.98E+   | 2.09E+ | 3.17E+                     | 3.53E+                   | 6.70E+                   | 9.33E- | 8.93E+                    | 2.09E+                   | 6.84E+ | 1.12E+  | 1.21E+0 |
|           | 02      | 01     | 05      | 01     | 00       | 00     | 00                         | 00                       | 00                       | 02     | 01                        | 01                       | 01     | 02      | 2       |
|           |         |        |         |        |          |        | -                          | -                        |                          |        |                           |                          |        |         |         |
|           | -4.23E- | 7.01E+ | -2.32E- | 3.78E+ | 3.96E+   | 2.09E+ | 2.42E+                     | 7.31E-                   | 1.69E+                   | 8.09E- | 7.01E+                    | 4.33E+                   | 2.68E+ | 9.18E+  | 1.43E+0 |
|           | 02      | 01     | 04      | 01     | 00       | 00     | 00                         | 01                       | 00                       | 02     | 01                        | 01                       | 01     | 01      | 2       |
|           |         |        |         |        |          |        | -                          | -                        |                          |        |                           |                          |        |         |         |
|           | -4.92E- | 2.30E+ | 6.40E-  | 4.59E+ | 1.68E+   | 6.81E- | 2.03E+                     | 3.56E+                   | 2.38E+                   | 1.16E+ | 9.04E+                    | 3.28E+                   | 9.01E+ | 9.08E+  | 5.31E+0 |
|           | 01      | 02     | 05      | 02     | 01       | 01     | 01                         | 00                       | 01                       | 00     | 02                        | 00                       | 02     | 02      | 2       |
|           |         |        |         |        |          |        | -                          | -                        |                          |        |                           |                          |        |         |         |
|           | -7.26E- | 7.72E+ | 2.69E-  | 5.47E+ | 5.84E+   | 1.89E+ | 3.36E+                     | 3.66E+                   | 3.99E+                   | 6.76E- | 2.99E+                    | 6.84E+                   | 7.13E+ | 1.95E+  | 1.73E+0 |
|           | 01      | 01     | 04      | 01     | 00       | 00     | 00                         | 01                       | 01                       | 01     | 00                        | 01                       | 01     | 01      | 2       |
|           |         |        |         |        |          |        | -                          | -                        |                          |        |                           |                          |        |         |         |
|           | -7.26E- | 7.72E+ | 2.02E-  | 5.47E+ | 5.84E+   | 1.89E+ | 3.36E+                     | 3.86E+                   | 4.19E+                   | 6.36E- | 2.77E+                    | 6.84E+                   | 7.12E+ | 1.93E+  | 1.74E+0 |

|           |          |           |          |          |          |           |          |          |          |          |          |          |          |          |
|-----------|----------|-----------|----------|----------|----------|-----------|----------|----------|----------|----------|----------|----------|----------|----------|
| 01        | 01       | 04        | 01       | 00       | 00       | 00        | 01       | 01       | 01       | 00       | 01       | 01       | 01       | 2        |
| -         |          |           |          |          |          | -         | -        | -        |          | -        |          | -        | -        |          |
| 1.13E+0   | 1.29E+02 | 7.20E-05  | 7.54E+01 | 8.15E+00 | 9.82E-01 | 5.90E+00  | 4.31E+00 | 1.02E+01 | 1.00E+00 | 8.96E+01 | 1.29E+01 | 7.67E+01 | 8.70E+01 | 5.43E+02 |
|           |          |           |          |          |          |           |          |          |          |          |          |          |          |          |
| 1.28E-01  | 4.04E+01 | 1.60E-05  | 5.64E-01 | 3.40E-01 | 5.32E-01 | -9.11E-01 | 2.81E+00 | 3.72E+00 | 4.61E-01 | 1.75E+01 | 1.67E+01 | 3.42E+01 | 2.32E+01 | 6.57E+00 |
|           |          |           |          |          |          |           |          |          |          |          |          |          |          |          |
| 1.27E-01  | 4.04E+01 | 2.30E-05  | 5.64E-01 | 3.41E-01 | 5.32E-01 | -9.13E-01 | 3.04E+00 | 3.95E+00 | 4.72E-01 | 1.75E+01 | 1.67E+01 | 3.43E+01 | 2.33E+01 | 6.51E+00 |
|           |          |           |          |          |          |           |          |          |          |          |          |          |          |          |
| Complex 2 |          |           |          |          |          |           |          |          |          |          |          |          |          |          |
|           |          |           |          |          |          |           |          |          |          |          |          |          |          |          |
| 9.57E-01  | 1.05E+02 | 4.83E-04  | 3.27E+01 | 1.23E+01 | 2.73E+00 | 1.23E+01  | 6.54E+01 | 5.31E+01 | 1.06E+00 | 1.53E+03 | 2.44E+01 | 1.56E+03 | 4.29E+02 | 5.46E+02 |
|           |          |           |          |          |          |           |          |          |          |          |          |          |          |          |
| -6.65E-02 | 7.04E+01 | 4.00E-05  | 3.78E+01 | 3.97E+00 | 2.10E+00 | 2.58E+00  | 1.72E+00 | 4.30E+00 | 7.96E-02 | 7.53E+01 | 3.11E+01 | 4.43E+01 | 9.75E+01 | 1.31E+02 |
|           |          |           |          |          |          |           |          |          |          |          |          |          |          |          |
| -7.69E-02 | 7.49E+01 | -1.02E-04 | 3.78E+01 | 3.99E+00 | 2.09E+00 | 3.19E+00  | 4.54E+00 | 7.73E+00 | 9.09E-02 | 8.97E+01 | 5.68E+01 | 3.29E+01 | 1.11E+02 | 1.26E+02 |
|           |          |           |          |          |          |           |          |          |          |          |          |          |          |          |
| -6.59E-02 | 7.67E+01 | -2.96E-04 | 3.78E+01 | 3.98E+00 | 2.08E+00 | 3.15E+00  | 6.68E+00 | 9.83E+00 | 8.29E-02 | 8.70E+01 | 1.67E+01 | 7.03E+01 | 1.09E+02 | 1.26E+02 |
|           |          |           |          |          |          |           |          |          |          |          |          |          |          |          |
| -4.00E-02 | 6.99E+01 | -5.43E-04 | 3.78E+01 | 3.96E+00 | 2.08E+00 | 2.20E+00  | 4.69E+00 | 2.49E+00 | 9.34E-02 | 6.43E+01 | 7.19E+01 | 7.61E+00 | 8.54E+01 | 1.50E+02 |
|           |          |           |          |          |          |           |          |          |          |          |          |          |          |          |
| -6.67E-02 | 7.04E+01 | 1.40E-05  | 3.78E+01 | 3.97E+00 | 2.10E+00 | 2.58E+00  | 3.40E-01 | 2.24E+00 | 1.05E-01 | 7.54E+01 | 3.10E+01 | 4.45E+01 | 9.75E+01 | 1.30E+02 |
|           |          |           |          |          |          |           |          |          |          |          |          |          |          |          |
| -7.67E-02 | 7.48E+01 | 2.55E-04  | 3.78E+01 | 3.99E+00 | 2.09E+00 | 3.19E+00  | 3.50E+00 | 6.69E+00 | 8.19E-02 | 8.98E+01 | 5.67E+01 | 3.31E+01 | 1.11E+02 | 1.26E+02 |
|           |          |           |          |          |          |           |          |          |          |          |          |          |          |          |
| -4.84E-01 | 2.34E+02 | 6.80E-05  | 4.59E+02 | 1.68E+01 | 6.57E-01 | 2.08E+01  | 4.12E+00 | 2.49E+01 | 1.12E+00 | 9.50E+02 | 1.89E+01 | 9.69E+02 | 9.55E+02 | 4.05E+02 |
|           |          |           |          |          |          |           |          |          |          |          |          |          |          |          |
| 1.16E+00  | 8.10E+01 | 6.60E-05  | 5.50E+01 | 6.27E+00 | 1.89E+00 | 3.34E+00  | 5.67E+01 | 6.00E+01 | 5.24E-01 | 2.40E+01 | 9.76E+01 | 7.36E+01 | 1.13E+01 | 3.45E+02 |
|           |          |           |          |          |          |           |          |          |          |          |          |          |          |          |
| 1.16E+00  | 8.09E+01 | 2.46E-04  | 5.50E+01 | 6.27E+00 | 1.89E+00 | 3.34E+00  | 5.92E+01 | 6.25E+01 | 4.90E-01 | 2.44E+01 | 9.81E+01 | 7.37E+01 | 1.17E+01 | 3.47E+02 |

|            |          |           |          |          |          |           |           |          |          |          |           |          |          |          |  |
|------------|----------|-----------|----------|----------|----------|-----------|-----------|----------|----------|----------|-----------|----------|----------|----------|--|
| Complex 1  |          |           |          |          |          |           |           |          |          |          |           |          |          |          |  |
| 9.67E-02   | 4.09E+01 | 9.50E-05  | 5.81E-01 | 3.58E-01 | 5.45E-01 | -9.04E-01 | 1.89E+00  | 2.80E+00 | 6.89E-02 | 1.80E+01 | 2.20E+01  | 4.00E+01 | 2.23E+01 | 1.05E+01 |  |
| Complex 2  |          |           |          |          |          |           |           |          |          |          |           |          |          |          |  |
| 1.03E-01   | 4.10E+01 | 7.70E-05  | 5.76E-01 | 3.53E-01 | 5.45E-01 | -9.10E-01 | 1.87E+00  | 2.78E+00 | 5.26E-02 | 1.79E+01 | 2.19E+01  | 3.98E+01 | 2.22E+01 | 9.71E+00 |  |
| Complex 3  |          |           |          |          |          |           |           |          |          |          |           |          |          |          |  |
| 9.59E-01   | 1.01E+02 | 2.52E-04  | 3.27E+01 | 1.23E+01 | 2.71E+00 | 1.57E+01  | 2.51E+01  | 9.33E+00 | 7.69E-01 | 1.45E+03 | 2.38E+01  | 1.47E+03 | 5.15E+02 | 5.85E+02 |  |
| Complex 4  |          |           |          |          |          |           |           |          |          |          |           |          |          |          |  |
| -5.37E-02  | 7.08E+01 | -6.10E-05 | 3.78E+01 | 3.97E+00 | 2.09E+00 | 2.74E+00  | 1.78E+00  | 4.52E+00 | 7.69E-02 | 7.80E+01 | 3.43E+01  | 4.37E+01 | 9.77E+01 | 1.36E+02 |  |
| Complex 5  |          |           |          |          |          |           |           |          |          |          |           |          |          |          |  |
| -6.12E-02  | 6.99E+01 | -1.90E-04 | 3.78E+01 | 3.97E+00 | 2.09E+00 | 2.66E+00  | 1.16E+00  | 3.81E+00 | 4.01E-01 | 7.74E+01 | 1.80E+01  | 5.94E+01 | 9.83E+01 | 1.35E+02 |  |
| Complex 6  |          |           |          |          |          |           |           |          |          |          |           |          |          |          |  |
| -5.33E-02  | 7.09E+01 | -1.48E-04 | 3.78E+01 | 3.97E+00 | 2.09E+00 | 2.71E+00  | -8.01E-01 | 3.52E+00 | 8.25E-02 | 7.71E+01 | 3.46E+01  | 4.25E+01 | 9.68E+01 | 1.37E+02 |  |
| Complex 7  |          |           |          |          |          |           |           |          |          |          |           |          |          |          |  |
| -7.24E-02  | 7.38E+01 | -1.20E-04 | 3.78E+01 | 3.98E+00 | 2.09E+00 | 2.90E+00  | 3.34E+00  | 6.24E+00 | 1.34E-01 | 8.08E+01 | 2.52E+00  | 7.83E+01 | 1.02E+02 | 1.32E+02 |  |
| Complex 8  |          |           |          |          |          |           |           |          |          |          |           |          |          |          |  |
| -6.28E-02  | 7.02E+01 | -2.92E-04 | 3.78E+01 | 3.98E+00 | 2.09E+00 | 2.69E+00  | -3.87E-01 | 3.08E+00 | 4.12E-01 | 7.80E+01 | 1.87E+01  | 5.94E+01 | 9.88E+01 | 1.36E+02 |  |
| Complex 9  |          |           |          |          |          |           |           |          |          |          |           |          |          |          |  |
| -7.20E-02  | 7.35E+01 | -2.53E-04 | 3.78E+01 | 3.98E+00 | 2.09E+00 | 2.88E+00  | 2.91E+00  | 5.79E+00 | 1.42E-01 | 8.04E+01 | 2.87E+00  | 7.76E+01 | 1.02E+02 | 1.32E+02 |  |
| Complex 10 |          |           |          |          |          |           |           |          |          |          |           |          |          |          |  |
| -4.94E-01  | 2.33E+02 | 8.90E-05  | 4.59E+02 | 1.68E+01 | 6.69E-01 | 2.04E+01  | 3.83E+00  | 2.42E+01 | 1.16E+00 | 9.18E+02 | 1.43E+01  | 9.32E+02 | 9.23E+02 | 6.30E+02 |  |
| Complex 11 |          |           |          |          |          |           |           |          |          |          |           |          |          |          |  |
| 1.14E+00   | 8.19E+01 | 2.23E-04  | 5.49E+01 | 6.27E+00 | 1.87E+00 | 3.46E+00  | 3.07E+01  | 3.42E+01 | 9.04E-01 | 1.84E+01 | 6.25E+01  | 4.41E+01 | 4.93E+00 | 3.41E+02 |  |
| Complex 12 |          |           |          |          |          |           |           |          |          |          |           |          |          |          |  |
| 1.14E+00   | 8.18E+01 | 5.60E-05  | 5.49E+01 | 6.27E+00 | 1.87E+00 | 3.46E+00  | 3.25E+01  | 3.60E+01 | 8.69E-01 | 1.79E+01 | 6.25E+01  | 4.46E+01 | 4.43E+00 | 3.41E+02 |  |
| Complex 13 |          |           |          |          |          |           |           |          |          |          |           |          |          |          |  |
| 1.15E+00   | 1.27E+02 | 1.11E-04  | 7.54E+01 | 8.14E+00 | 1.01E+00 | 5.80E+00  | 1.14E+01  | 1.72E+01 | 8.93E-01 | 7.45E+01 | -1.02E-01 | 7.46E+01 | 7.20E+01 | 5.01E+02 |  |
| Complex 14 |          |           |          |          |          |           |           |          |          |          |           |          |          |          |  |
| 1.15E+00   | 1.27E+02 | 1.17E-04  | 7.54E+01 | 8.14E+01 | 1.01E+01 | 5.82E+01  | 1.19E+01  | 1.77E+01 | 8.78E-01 | 7.53E+01 | -5.23E-01 | 7.54E+01 | 7.28E+01 | 4.99E+02 |  |

|           |          |           |          |          |          |           |          |          |          |          |          |          |          |          |
|-----------|----------|-----------|----------|----------|----------|-----------|----------|----------|----------|----------|----------|----------|----------|----------|
| 0         | 02       | 04        | 01       | 00       | 00       | 00        | 01       | 01       | 01       | 01       | 02       | 01       | 01       | 2        |
| 1.18E-01  | 3.91E+01 | 2.20E-05  | 5.75E-01 | 3.43E-01 | 5.39E-01 | -9.17E-01 | 5.56E+00 | 6.48E+00 | 3.52E-01 | 1.80E+01 | 9.34E+00 | 8.68E+00 | 2.41E+01 | 6.77E+00 |
| 1.22E-01  | 3.86E+01 | 3.20E-05  | 5.74E-01 | 3.40E-01 | 5.39E-01 | -9.03E-01 | 5.80E+00 | 6.70E+00 | 3.54E-01 | 1.79E+01 | 9.83E+00 | 8.07E+00 | 2.40E+01 | 7.09E+00 |
| Complex 4 |          |           |          |          |          |           |          |          |          |          |          |          |          |          |
| 9.82E-01  | 1.12E+02 | -8.61E-04 | 3.27E+01 | 1.24E+01 | 2.63E+00 | 1.72E+01  | 3.72E+01 | 2.00E+01 | 3.23E-01 | 1.38E+03 | 2.40E+01 | 1.41E+03 | 5.81E+02 | 7.13E+02 |
| -5.75E-02 | 7.36E+01 | -2.60E-05 | 3.78E+01 | 3.98E+00 | 2.08E+00 | 2.80E+00  | 3.30E+00 | 6.10E+00 | 7.55E-02 | 7.77E+01 | 2.22E+01 | 5.55E+01 | 9.86E+01 | 1.32E+02 |
| -5.54E-02 | 7.08E+01 | -2.19E-04 | 3.78E+01 | 3.97E+00 | 2.08E+00 | 2.71E+00  | 3.84E+00 | 6.55E+00 | 7.39E-02 | 7.94E+01 | 7.69E+00 | 7.17E+01 | 1.02E+02 | 1.32E+02 |
| -5.77E-02 | 7.36E+01 | -3.00E-05 | 3.78E+01 | 3.98E+00 | 2.08E+00 | 2.81E+00  | 2.41E+00 | 5.22E+00 | 9.46E-02 | 7.79E+01 | 2.22E+01 | 5.57E+01 | 9.87E+01 | 1.32E+02 |
| -4.58E-02 | 7.27E+01 | -9.20E-05 | 3.78E+01 | 3.97E+00 | 2.08E+00 | 2.85E+00  | 5.17E+00 | 8.02E+00 | 9.35E-02 | 8.34E+01 | 6.44E+00 | 8.98E+01 | 1.07E+02 | 1.31E+02 |
| -5.55E-02 | 7.07E+01 | -3.53E-04 | 3.78E+01 | 3.97E+00 | 2.08E+00 | 2.71E+00  | 3.48E+00 | 6.19E+00 | 8.67E-02 | 7.92E+01 | 7.80E+00 | 7.14E+01 | 1.02E+02 | 1.32E+02 |
| -4.61E-02 | 7.27E+01 | -7.90E-05 | 3.78E+01 | 3.97E+00 | 2.08E+00 | 2.85E+00  | 4.95E+00 | 7.80E+00 | 1.01E-01 | 8.35E+01 | 6.38E+00 | 8.99E+01 | 1.07E+02 | 1.31E+02 |
| -7.38E-01 | 8.21E+01 | 2.73E-04  | 5.47E+01 | 5.89E+00 | 1.85E+00 | 3.51E+00  | 1.44E+01 | 1.79E+01 | 5.90E-01 | 1.80E+00 | 3.50E+01 | 3.68E+01 | 1.66E+01 | 1.21E+02 |
| -7.38E-01 | 8.21E+01 | 2.80E-04  | 5.47E+01 | 5.89E+00 | 1.85E+00 | 3.51E+00  | 1.46E+01 | 1.81E+01 | 5.75E-01 | 1.80E+00 | 3.50E+01 | 3.68E+01 | 1.66E+01 | 1.21E+02 |
| 1.18E+00  | 7.93E+01 | 4.18E-04  | 5.51E+01 | 6.30E+00 | 1.87E+00 | 4.22E+00  | 2.86E+01 | 3.28E+01 | 3.23E-01 | 3.98E+01 | 6.59E+01 | 1.06E+02 | 5.34E+01 | 1.95E+02 |
| Complex 5 |          |           |          |          |          |           |          |          |          |          |          |          |          |          |
| 9.80E-01  | 1.09E+02 | 1.36E-03  | 3.27E+01 | 1.23E+01 | 2.69E+00 | 1.65E+01  |          |          | 5.13E-01 | 1.36E+03 | 2.32E+01 | 1.38E+03 |          | 4.66E+02 |
|           |          |           |          |          |          |           | 5.14E+01 | 3.49E+01 |          |          |          |          | 6.08E+01 |          |

|         |        |         |        |        |        |        |        |        |        |        |        |        |        |         | 01 |   | 01 |   | 02 |   |
|---------|--------|---------|--------|--------|--------|--------|--------|--------|--------|--------|--------|--------|--------|---------|----|---|----|---|----|---|
| -4.88E- | 7.28E+ | -3.90E- | 3.78E+ | 3.97E+ | 2.08E+ | 2.82E+ | 5.26E+ | 8.08E+ | 6.77E- | 8.26E+ | 1.05E+ | 8.15E+ | 1.04E+ | 1.33E+0 | -  | - | -  | - | -  | - |
| 02      | 01     | 04      | 01     | 00     | 00     | 00     | 00     | 00     | 02     | 01     | 00     | 01     | 02     | 2       |    |   |    |   |    |   |
| -5.86E- | 7.09E+ | -3.20E- | 3.78E+ | 3.97E+ | 2.08E+ | 2.72E+ | 1.28E+ | 4.00E+ | 1.08E- | 7.85E+ | 2.39E+ | 5.46E+ | 9.99E+ | 1.34E+0 | -  | - | -  | - | -  | - |
| 02      | 01     | 05      | 01     | 00     | 00     | 00     | 00     | 00     | 01     | 01     | 01     | 01     | 01     | 2       |    |   |    |   |    |   |
| -4.81E- | 7.26E+ | 4.30E-  | 3.78E+ | 3.97E+ | 2.08E+ | 2.81E+ | 5.08E+ | 7.89E+ | 6.63E- | 8.24E+ | 1.02E+ | 8.14E+ | 1.04E+ | 1.33E+0 | -  | - | -  | - | -  | - |
| 02      | 01     | 05      | 01     | 00     | 00     | 00     | 00     | 00     | 02     | 01     | 00     | 01     | 02     | 2       |    |   |    |   |    |   |
| -6.19E- | 7.32E+ | -2.73E- | 3.78E+ | 3.98E+ | 2.08E+ | 2.73E+ | 2.89E+ | 5.62E+ | 1.00E- | 7.44E+ | 4.68E+ | 2.76E+ | 9.43E+ | 1.38E+0 | -  | - | -  | - | -  | - |
| 02      | 01     | 04      | 01     | 00     | 00     | 00     | 00     | 00     | 01     | 01     | 01     | 01     | 01     | 2       |    |   |    |   |    |   |
| -5.90E- | 7.11E+ | -3.44E- | 3.78E+ | 3.97E+ | 2.08E+ | 2.72E+ | 1.14E+ | 3.86E+ | 1.17E- | 7.88E+ | 2.38E+ | 5.49E+ | 1.00E+ | 1.34E+0 | -  | - | -  | - | -  | - |
| 02      | 01     | 04      | 01     | 00     | 00     | 00     | 00     | 00     | 01     | 01     | 01     | 01     | 02     | 2       |    |   |    |   |    |   |
| -6.16E- | 7.31E+ | -2.82E- | 3.78E+ | 3.98E+ | 2.08E+ | 2.73E+ | 2.89E+ | 5.62E+ | 9.87E- | 7.42E+ | 4.68E+ | 2.74E+ | 9.40E+ | 1.38E+0 | -  | - | -  | - | -  | - |
| 02      | 01     | 04      | 01     | 00     | 00     | 00     | 00     | 00     | 02     | 01     | 01     | 01     | 01     | 2       |    |   |    |   |    |   |
| 1.17E+0 | 8.46E+ | 2.33E-  | 5.49E+ | 6.31E+ | 1.86E+ | 3.60E+ | 2.02E+ | 2.38E+ | 4.48E- | 6.06E+ | 4.15E+ | 3.55E+ | 6.43E+ | 2.96E+0 | -  | - | -  | - | -  | - |
| 0       | 01     | 04      | 01     | 00     | 00     | 00     | 01     | 01     | 01     | 00     | 01     | 01     | 00     | 2       |    |   |    |   |    |   |
| 1.17E+0 | 7.77E+ | 4.56E-  | 5.51E+ | 6.26E+ | 1.91E+ | 3.45E+ | 4.33E+ | 4.68E+ | 2.20E- | 9.09E+ | 1.00E+ | 9.11E+ | 4.13E+ | 2.62E+0 | -  | - | -  | - | -  | - |
| 0       | 01     | 04      | 01     | 00     | 00     | 00     | 01     | 01     | 01     | 00     | 02     | 01     | 00     | 2       |    |   |    |   |    |   |
| 1.17E+0 | 8.46E+ | 2.77E-  | 5.49E+ | 6.31E+ | 1.86E+ | 3.61E+ | 2.10E+ | 2.46E+ | 3.55E- | 5.54E+ | 4.13E+ | 3.57E+ | 6.90E+ | 2.94E+0 | -  | - | -  | - | -  | - |
| 0       | 01     | 04      | 01     | 00     | 00     | 00     | 01     | 01     | 01     | 00     | 01     | 01     | 00     | 2       |    |   |    |   |    |   |
